1 *Expanded Genomic Sampling of the Desulfobulbales*  
2 *Reveals Distribution and Evolution of Sulfur Metabolisms*

3  
4 Lewis M. Ward<sup>1\*</sup>, Emma Bertran<sup>2\*</sup>, David T. Johnston<sup>1</sup>

5  
6 <sup>1</sup>Department of Earth and Planetary Sciences, Harvard University;

7 <sup>2</sup>Princeton Environmental Institute, Princeton University

8  
9 \*These authors contributed equally. Correspondence to: [lewis\\_ward@fas.harvard.edu](mailto:lewis_ward@fas.harvard.edu) or  
10 [ebertran@princeton.edu](mailto:ebertran@princeton.edu)

11  
12  
13  
14  
15  
16  
17  
18  
19  
20  
21  
22  
23  
24  
25  
26  
27  
28  
29  
30  
31  
32  
33  
34  
35  
36  
37  
38  
39  
40

## 41 **Abstract**

42  
43 The reconstruction of modern and paleo-sulfur cycling relies on understanding the long-term  
44 relative contribution of its main actors; these include microbial sulfate reduction (MSR) and  
45 microbial sulfur disproportionation (MSD). However, a unifying theory is lacking for how MSR  
46 and MSD, with the same enzyme machinery and intimately linked evolutionary histories,  
47 perform two drastically different metabolisms. Here, we aim at shedding some light on the  
48 distribution, diversity, and evolutionary histories of MSR and MSD, with a focus on the  
49 Desulfobulbales as a test case. The Desulfobulbales is a diverse and widespread order of bacteria  
50 in the Desulfobacterota (formerly Deltaproteobacteria) phylum primarily composed of sulfate  
51 reducing bacteria. Recent culture- and sequence-based approaches have revealed an expanded  
52 diversity of organisms and metabolisms within this clade, including the presence of obligate and  
53 facultative sulfur disproportionators. Here, we present draft genomes of previously unsequenced  
54 species of Desulfobulbales, substantially expanding the available genomic diversity of this clade.  
55 We leverage this expanded genomic sampling to perform phylogenetic analyses, revealing an  
56 evolutionary history defined by vertical inheritance of sulfur metabolism genes with numerous  
57 convergent instances of transition from sulfate reduction to sulfur disproportionation.

58  
59

## 60 **Introduction**

61  
62 Microbial sulfur metabolisms drive the biogeochemical sulfur cycle over geologic timescales and  
63 couple it to the carbon, oxygen, and iron cycles (Johnston et al., 2005; Fike et al., 2015). Though  
64 the contribution of these metabolisms to net global carbon fixation rates is low relative to that of  
65 photosynthesis (e.g., Ward and Shih 2019), carbon and sulfur fluxes through dissimilatory sulfur  
66 metabolisms are large and provide a significant control on net oxidation-reduction (redox)  
67 balance, in turn driving changes in Earth surface conditions (Berner and Raiswell, 1984; Berner  
68 and Canfield, 1989; Canfield, 2001; Fike et al., 2015). The main microbial metabolisms that  
69 drive the sulfur cycle are microbial sulfate reduction (MSR), sulfide oxidation (SO), and sulfur  
70 disproportionation (MSD) (Johnston et al., 2005; Fike et al., 2015). MSR couples the oxidation  
71 of simple organic molecules – including H<sub>2</sub> for some organisms – to the reduction of sulfate,  
72 thiosulfate, and in some cases sulfite (Rosenberg et al., 2014, and references within). This  
73 reductive sulfur reaction promotes the burial of sedimentary pyrite and the remineralization of  
74 organic matter, which are major controls on Earth's surface redox conditions (Canfield, 2001;  
75 Fike et al., 2015; Canfield and Teske, 1996; Jorgensen, 1982). MSD, heavily involved in the  
76 oxidative sulfur cycle (Canfield, 2001), is a chemolithotrophic process by which sulfur species of  
77 intermediate valence – thiosulfate, sulfite, and/or elemental sulfur – act as both electron acceptor  
78 and donor, producing sulfate and sulfide as final products (Canfield and Thamdrup, 1994;  
79 Canfield et al., 1998; Finster et al., 1998; Finster et al., 2013; Frederiksen and Finster, 2003;

80 Habicht and Canfield, 1998; Thamdrup et al., 1993; Finster, 2008 for a review on this metabolic  
81 pathway).

82  
83 It has long been understood that MSR and MSD share core reactions and enzymatic machineries  
84 (Frederiksen and Finster, 2003), yet yield drastically different net pathways - a mechanistic  
85 argument for this conundrum is lacking. MSR is a respiratory pathway while, MSD is  
86 fermentative and the energetic yields for each differ significantly. Sulfate reduction is a vastly  
87 more thermodynamically favorable metabolism than sulfur disproportionation under standard  
88 conditions (Finster, 2008; Wing and Halevy, 2014). As an example, in the absence of a sulfide  
89 sink, elemental sulfur disproportionation is effectively an endergonic reaction (Finster et al.,  
90 1998; Finster, 2008). It was then surprising when early pure culture experiments, as well as full  
91 genome sequencing and enzyme extract studies, revealed sulfate reduction and sulfur  
92 disproportionation share the same sulfur metabolism enzymes – sulfate adenylyltransferase,  
93 adenylylsulfate reductase (subunits A and B), dissimilatory sulfite reductase (subunits A, B, and  
94 C), and the sulfite reduction-associated DsrMKJOP complex – (Frederiksen and Finster, 2003;  
95 Finster et al., 2013). These are also dramatically different from those enzymes driving sulfide  
96 oxidation. It would thus be expected for sulfur disproportionating microbes to be capable of  
97 using sulfate as an electron acceptor in the presence of organic matter, and for sulfate reducers to  
98 disproportionate sulfur species of intermediate valence when conditions permitted. This  
99 expectation on the metabolic plasticity of sulfate reducers and sulfur disproportionators is not  
100 met and most sulfur disproportionators are incapable of MSR (Finster et al., 1998). To date, only  
101 two exceptions to this phenomenon have been reported: *Desulfocapsa thiozymogenes* (Junghare  
102 and Schink, 2015; Rosenberg et al., 2014; Canfield *et al.*, 1998; Janssen *et al.*, 1996) and  
103 *Desulfobulbus propionicus* (Widdel, 1980; Sorokin et al., 2012; Widdel and Pfennig, 1982;  
104 Janssen et al., 1996; Böttcher et al., 2005; El Houari et al., 2017; Kramer and Cypionka 1989;  
105 Lovley and Phillips 1994; Fuseler and Cypionka 1995).

106  
107 Understanding the similarities and differences between MSR and MSD carries geological  
108 importance. The antiquity of sulfate reduction has been dated back to the Archean using the  
109 MSR sulfur isotopic signature (Shen et al., 2001; Bontognali et al., 2012). On the other hand, the  
110 antiquity of sulfur disproportionation is harder to pinpoint. Chemical and isotopic signatures  
111 suggest the rise to ecological significance of MSD to be as late as the Mesoproterozoic (Johnston  
112 et al., 2005) or as early as the Archean (Phillippot et al., 2007), and molecular clock work to  
113 refine the timing of emergence of MSD is lacking. For thermodynamic reasons, the ecological  
114 niche occupied by MSD includes partially oxidizing conditions and a sulfide sink (Finster,  
115 2008), conditions that are met only post the Great Oxidation Event. This would then suggest that  
116 MSD rose to ecological significance later than MSR (Canfield and Teske, 1996). All in all, the  
117 shared nature of the MSR and MSD metabolic pathways coupled with full genome sequencing  
118 efforts have led to the inference that MSR and MSD are old and share a complex evolutionary  
119 history that is difficult to untangle.

120

121 The knowledge gap here resides with our understanding of MSD, as MSR has been far more  
122 thoroughly studied (Fry et al., 1986; LeGall and Fauque 1988; Canfield, 2001; Shen et al. 2001;  
123 Habicht and Canfield, 1998; Habicht et al., 2002; Zane et al, 2010; Pereira et al., 2011; Keller  
124 and Wall, 2011; Leavitt et al., 2013; Parey et al., 2013; Wing and Halevy, 2014; Fike et al.,  
125 2015; Bradley et al., 2016; Bertran et al., 2018). That is, the true diversity and ecological  
126 distribution of sulfur disproportionation is still unknown owing to the lack of a unique enzymatic  
127 and genetic marker. Recently, increased efforts, technological advancements and sampling in  
128 metagenomics have expanded the ecological distribution and significance of MSR in modern  
129 sediments (Anantharaman et al., 2018; Vigneron et al., 2018). However, and as noted above,  
130 efforts for MSD are lagging due largely to the absence of established marker genes to distinguish  
131 the capacity of MSD from MSR based on genome data alone (Anantharaman et al., 2018). The  
132 true diversity and ecological distribution of S metabolisms is still poorly understood despite the  
133 central role of these pathways in modern and past biogeochemical cycling and potential role in  
134 neo-environments as sulfidic environments spread with changing climate.

135

136 An ideal case study for investigating the evolutionary relationship between MSR and MSD exists  
137 in the bacterial order Desulfobulbales. The Desulfobulbales are members of the Desulfobacterota  
138 (formerly Deltaproteobacteria) phylum (Fig. 2) and include diverse and environmentally  
139 widespread members that play a central role in sulfur biogeochemical cycling in both modern  
140 and paleo-sediments (Fike et al., 2015) (Fig. 1). The Desulfobulbales were first described in  
141 1980 when Widdel and colleagues described *Desulfobulbus*, the type genus of the order (Widdel  
142 et al., 1980; Kuever et al., 2005), but now consist of at least three family-level clades spanning at  
143 least ten genera (Fig. 3). Members of the Desulfobulbales order have been described by a wide a  
144 range of morphological and chemotaxonomic properties (Rosenberg et al., 2014), and while they  
145 have been isolated from various sources – freshwater, marine environments, brackish water, and  
146 haloalkaline environments – most are mesophilic bacteria and all isolates are strictly anaerobic  
147 (Kuever, 2014). The Desulfobulbales order also includes the recently discovered filamentous  
148 “cable bacteria” (Kjeldsen et al., 2019), which have been shown to link redox processes across  
149 sediment layers separated by distances over 1 cm via long-distance electron transport (Müller et  
150 al., 2016) and may even be capable of sulfur disproportionation under some conditions (Müller et  
151 al., 2020). However, cable bacteria have so far resisted isolation in pure culture, preventing  
152 detailed physiological characterization (Pfeffer et al., 2012; Schauer et al., 2014; Bjerg et al.,  
153 2016; Kjeldsen et al., 2019). As a result, cable bacteria will not be included in our analysis.

154

155 Here, we first provide a revised genome-based taxonomy of the Desulfobulbales. We do this by  
156 presenting draft genomes of previously unsequenced isolates belonging to the Desulfobulbales,  
157 and couple this newly expanded genomic sampling with comparative genomic and phylogenetic  
158 analyses. We then examine the distribution and potential ecological diversity of MSR and MSD  
159 and provide insight into the relationships between strains previously characterized as sulfate

160 reducers or sulfur disproportionators. Ultimately, these will provide a refined assessment of the  
161 major evolutionary transitions between the lineages of sulfate reduction and sulfur  
162 disproportionation.

163

## 164 **Methods**

165

### 166 **Genome sequencing and analysis**

167

168 Our analyses focused on Desulfobulbales strains that have both been well characterized in pure  
169 culture and for which high-quality genome sequences are available. We therefore omitted  
170 organisms known only from metagenome-, environmental-, or enrichment-based analyses,  
171 including the cable bacteria. Preexisting genome sequences of Desulfobulbales were downloaded  
172 from the NCBI WGS and Genbank databases. In order to thoroughly sample the genomic  
173 diversity of well-characterized Desulfobulbales isolates, we also performed genome sequencing  
174 on six species of Desulfobulbales that are available in pure culture but for which genome  
175 sequencing had not previously been performed. These included: *Desulforhopalus vacuolatus*  
176 (Isaksen and Teske 1996), *Desulfobulbus marinus* (Widdel and Pfennig 1982, Kuever et al.,  
177 2015), *Desulfoprunum benzoelyticum* (Junghare and Schink 2015), *Desulfopila inferna* (Gittel et  
178 al., 2010), *Desulfobulbus rhabdoformis* (Lien et al., 1998), and *Desulfobulbus alkaliphilus*  
179 (Sorokin et al., 2012).

180

181 Draft genomes for Desulfobulbales isolates were sequenced following methods described  
182 previously (Bertran et al., 2020a, Bertran et al., 2020b, Bertran et al., 2020c, Ward et al., 2020a,  
183 Ward et al., 2020b) and outlined briefly below. Purified genomic DNA was acquired for each  
184 strain from the DSMZ and submitted to MicrobesNG for sequencing. DNA extraction was  
185 performed with a JetFlex genomic DNA purification kit from Genomed. DNA libraries were  
186 prepared using Nextera XT library prep kits using a Hamilton Microlab Star automated liquid  
187 handling system. Sequencing was performed with an Illumina HiSeq using a 250 base pair  
188 paired-end protocol. Reads were adapter trimmed with Trimmomatic 0.30 (Bolger et al., 2014).  
189 De novo assembly was performed with SPAdes version 3.7 (Bankevich et al., 2012). Genomes  
190 were annotated and analyzed using RAST v2.0 (Aziz et al., 2008). Completeness and  
191 contamination/redundancy of genomes was estimated with CheckM v1.0.12 (Parks et al., 2015).  
192 The likelihood for presence or absence of metabolic pathways was determined using MetaPOAP  
193 v1.0 (Ward et al., 2018a). Taxonomic assignments were verified with GTDB-Tk v0.3.2 (Parks et  
194 al., 2018). Hydrogenase proteins were classified with HydDB (Søndergaard et al., 2016).

195

### 196 **Phylogenetic analyses**

197

198 Phylogenetic analyses followed methods described elsewhere (Ward et al., 2020c, Ward and  
199 Shih 2021) and summarized below. Genomes were downloaded from the NCBI Genbank and

200 WGS databases. The dataset used for comparative genomics analyses consisted of all complete  
201 or high quality (following current standards, Bowers et al., 2017) genomes of isolated members  
202 of the Desulfobulbales. Phylogenetic analyses incorporated all genomes of isolates as well as  
203 metagenome-assembled genomes of members of the Desulfobacterota (Deltaproteobacteria)  
204 available on the NCBI Genbank and WGS databases as of August 2019. Protein sequences used  
205 in analyses (see below) were identified locally with the *tblastn* function of BLAST+ v2.6.0  
206 (Camacho et al., 2009), aligned with MUSCLE v3.8.31 (Edgar, 2004), and manually curated in  
207 Jalview v2.10.5 (Waterhouse, 2009). Positive BLAST hits were considered to be full length (e.g.  
208 >90% the shortest reference sequence from an isolate genome) with e-values better than 1e-20.  
209 Phylogenetic trees were calculated using RAxML v8.2.12 (Stamatakis, 2014) on the Cipres  
210 science gateway (Miller et al., 2010). Transfer bootstrap support values were calculated by  
211 BOOSTER (Lemoine et al., 2018). Trees were visualized with the Interactive Tree of Life  
212 viewer (Letunic and Bork, 2016). Taxonomic assignment was confirmed with GTDB-Tk v0.3.2  
213 (Parks et al., 2018, Chaumeil et al., 2019). Amino Acid Identity of genomes was determined  
214 following methods from Rodriguez and Konstantinidis (2014). The shared evolutionary histories  
215 of the sulfate reduction and sulfur disproportionation lineages was inferred by inspection of the  
216 topological congruence of organismal and metabolic protein phylogenies following previously  
217 established methods (Doolittle, 1986; Ward et al., 2018b) and following the most parsimonious  
218 conclusion on vertical inheritance, divergence, and general evolutionary transitions. Protein  
219 sequence annotation was done by GhostKOALA using default settings (Kanehisa et al., 2016)  
220 and amino acid sequences translated by Prodigal (Hyatt et al., 2010). Visualization of the  
221 presence or absence of complete or partial metabolic pathways was done using KEGG-decoder  
222 (Graham et al., 2018) after manual formatting of GhostKOALA output.

223

## 224 **Results and discussion**

225

### 226 **Draft genomes of Desulfobulbales isolates**

227

228 In order to improve coverage of genomic diversity of Desulfobulbales, we sequenced draft  
229 genomes from isolates of six species from the Desulfobulbaceae and Desulfocapsaceae families:  
230 *Desulforhopalus vacuolatus* (Isaksen and Teske, 1996), *Desulfobulbus marinus* (Widdel and  
231 Pfennig, 1982; Kuever et al., 2015), *Desulfoprimum benzoelyticum* (Junghare and Schink, 2015),  
232 *Desulfopila inferna* (Gittel et al., 2010), *Desulfobulbus rhabdoformis* (Lien et al., 1998), and  
233 *Desulfobulbus alkaliphilus* (Sorokin et al., 2012). Genome statistics are summarized in Table 1  
234 and presence of relevant functional genes is described below. *D. vacuolatus*, *D. marinus*, *D.*  
235 *benzoelyticum*, *D. inferna*, *D. rhabdoformis*, and *D. alkaliphilus* all encode the full enzymatic  
236 machinery shared by dissimilatory sulfate reduction and sulfur disproportionation, that is,  
237 DsrAB, DsrMKJOP, and AprAB (Keller and Wall, 2011; Pereira et al., 2011; Parey et al., 2013).  
238 While all these strains have been reported as sulfate reducing bacteria based on pure culture  
239 experiments geared to test their metabolic capacities (Isaksen and Teske, 1996; Widdel and

240 Pfennig, 1982; Kuever et al., 2015; Junghare and Schink, 2015; Gittel et al., 2010; Lien et al.,  
241 1998; Sorokin et al., 2012) only, *D. vacuolatus* has been reported incapable of sulfur  
242 disproportionation (Isaksen and Teske, 1996) . The other strains have yet to be tested for the  
243 capacity to disproportionate intermediate valence sulfur species. Further, a correlation between  
244 the length of the AprB C-terminus and the capacity to perform sulfate reduction or  
245 disproportionation has recently been suggested, where a truncated C-terminus would be  
246 indicative of sulfur disproportionation (Bertran, 2019). *D. finferna*, encodes a full length AprB  
247 protein, whereas *D. vacuolatus*, *D. marinus*, *D. benzoelyticum*, *D. rhabdoformis*, and *D.*  
248 *alkaliphilus* encode a truncated C-terminal AprB domain like other sulfur disproportionators in  
249 the Desulfobulbaceae (Bertran, 2019). However, further work is needed to confirm the validity  
250 of this truncation as a distinct genetic marker for sulfur disproportionation and there is, to date,  
251 no definite feature that distinguishes sulfate reducers from sulfur disproportionators.

252  
253 Despite their characterization as obligate anaerobes, *D. vacuolatus* and *D. rhabdoformis* encode  
254 the capacity for O<sub>2</sub> reduction via a *bd* O<sub>2</sub> reductase. While *bd* O<sub>2</sub> reductase enzymes are  
255 sometimes coupled to aerobic respiration (e.g., in *Nitrospira*, Palomo et al., 2018), they can be  
256 found in obligate anaerobes (e.g., Ward et al., 2015) where they are likely associated with O<sub>2</sub>  
257 detoxification and oxidative stress tolerance (Forte et al., 2017). Additionally, *D. benzoelyticum*,  
258 *D. rhabdoformis* and *D. marinus* also encode A-family heme copper oxidoreductases (HCOs) for  
259 O<sub>2</sub> reduction; while these enzymes are typically coupled to aerobic respiration they can also be  
260 found in obligate anaerobes (e.g. Pace et al., 2015, Hemp et al., 2015). In anaerobic organisms,  
261 such as members of the Desulfobulbales, these proteins are likely also associated with O<sub>2</sub>  
262 detoxification and oxidative stress tolerance (e.g. Forte et al., 2017). Closely related A-family  
263 HCO proteins are also encoded by other Desulfobulbales such as *Desulfopila aestuarii*,  
264 *Desulfofustis glycolicus*, *Desulfobulbus japonicus*, *Desulfobulbus mediterraneus*, and  
265 *Desulfobulbus elongatus*. These Desulfobulbales HCOs form a closely related clade in broad  
266 HCO phylogenies sampling across diverse bacteria and archaea (Supplemental Figure 1). This  
267 suggests broad vertical inheritance of HCOs from a common ancestor of the Desulfobulbales,  
268 with perhaps a small amount intra-order HGT, potentially suggesting a long history of  
269 aerotolerance in the Desulfobulbales that stands in contrast to the O<sub>2</sub> sensitivity of other orders of  
270 Desulfobacterota (e.g., Rosenberg et al., 2014). This may have served as a preadaptation to  
271 marginal redox environments in which the transition from MSR to MSD may have been favored,  
272 leading to the relatively high density of novel transitions to sulfur disproportionation in the  
273 Desulfobulbales.

274  
275 Several of the Desulfobulbales genomes reported here also encode proteins involved in nitrogen  
276 redox reactions. Nitrogen fixation via a molybdenum nitrogenase is encoded by *D. vacuolatus*,  
277 *D. inferna*, and *D. marinus*. *D. rhabdoformis* encodes both a molybdenum nitrogenase as well  
278 as a vanadium alternative nitrogenase. Additionally, *D. marinus* encodes nitrite reduction to  
279 ammonium via NrfH. Despite being characterized as incapable of nitrate respiration (Junghare

280 and Schink, 2015), *D. benzoelyticum* encodes a pathway for nitrate reduction to ammonia  
281 including nitrate reductase and cytochrome c552 nitrite reductase.

282  
283 Members of the Desulfobulbales utilize various electron donors for growth, typically including  
284 simple alcohols, organic acids, and other small organic compounds which are typically  
285 incompletely oxidized (producing CO<sub>2</sub> and acetate) (Kuever, 2014). Among notable exceptions  
286 to this trend in the Desulfobulbales strains discussed here, *D. benzoelyticum* is known to  
287 completely degrade benzoate to CO<sub>2</sub> (Junghare and Schink, 2015). Benzoate degradation is  
288 known to be performed by a pathway consisting first of benzoate-CoA ligase and downstream  
289 enzymes including benzoyl-CoA reductase and benzoyl-CoA 2,3-epoxidase. The *D.*  
290 *benzoelyticum* genome recovered genes encoding for benzoate-CoA ligase but not known genes  
291 for downstream steps. Given the high completeness of the *D. benzoelyticum* genome (~99.85 %),  
292 the probability that the complete genome encodes additional benzoate degradation genes is  
293 incredibly low (<10<sup>-7</sup>) as determined by MetaPOAP (Ward et al., 2018). This suggests that *D.*  
294 *benzoelyticum* may utilize a novel pathway for benzoate metabolism using previously  
295 uncharacterized genes, though additional genetic and biochemical study will be necessary to  
296 validate this hypothesis.

297

## 298 **Diversity and taxonomy of Desulfobulbales**

299

300 Classically, the family Desulfobulbaceae within the Desulfobacterales order of the  
301 Deltaproteobacteria phylum has included the genera *Desulfobulbus*, *Desulfocapsa*, *Desulfofustis*,  
302 *Desulfopila*, *Desulforhopalus*, *Desulfotalea*, and *Desulfurivibrio* (Kuever, 2014). However,  
303 recent attempts at more systematic and normalized taxonomies based on full genome  
304 comparisons (e.g. Rinke et al., 2020, Waite et al., 2020) provide an opportunity to reassess this  
305 classification. The Deltaproteobacteria in particular have proven excellent cases for the necessity  
306 of taxonomic reappraisal as lineages assigned to this phylum have been shown to be  
307 polyphyletic, not closely related to other groups defined as Proteobacteria, and likely to represent  
308 several phylum-level groups (e.g., Hug et al., 2016, Waite et al., 2020). In recognition of these  
309 facts, the Genome Taxonomy Database (GTDB) has divided the Deltaproteobacteria into several  
310 monophyletic phyla including Desulfobacterota, which contains the bulk of classical  
311 Deltaproteobacteria such as *Desulfovibrio*, *Desulfobacter*, and *Desulfobulbus* (Parks et al., 2018,  
312 Waite et al., 2020). Additionally, the GTDB proposes further subdivision of lower taxonomic  
313 levels in order to remove poly- or para-phyletic groupings and normalize taxonomic ranks (Parks  
314 et al., 2018). In the case of the Desulfobulbaceae, the GTDB has reassigned these organisms to  
315 four families (Desulfobulbaceae, Desulfocapsaceae, Desulfurivibrionaceae, and BM004) within  
316 the new order Desulfobulbales of the Desulfobacterota phylum.

317

318 Our expanded phylogeny of the Desulfobulbales is broadly consistent with the revised GTDB  
319 taxonomy (Figure 2, Figure 3), recapitulating a monophyletic Desulfobulbales order within the



320 Desulfobacterota as well as producing consistent family-level groupings within this order. The  
321 GTDB further suggests subdivision of the *Desulfobulbus* genus into at least two genera within  
322 the Desulobulbaceae family. AAI analyses (Supplemental Table 2) shows no higher than 75%  
323 similarity in any pairwise comparison of characterized Desulfobulbales strains, consistent with  
324 each strain representing at least a unique species. Genus-level cutoffs of 55-60% largely follow  
325 taxonomic boundaries assigned based on physiology and other classical metrics. While the  
326 GTDB suggests the subdivision of *Desulfobulbus* into at least two genera – that is,  
327 *Desulfobulbus sensu stricto* which includes *D. marinus*, *D. oralis*, *D. propionicus*, and a genus  
328 including *D. rhabdoformis* and *Desulfobulbus A* containing *D. japonicus* and *D. mediterraneus* –  
329 this subdivision is only somewhat supported by AAI analyses. Pairwise AAI similarity between  
330 *Desulfobulbus* strains is only  $< 0.55$  for *Desulfobulbus oralis* when compared against *D.*  
331 *japonicus*, *D. mediterraneus*, or *D. marinus*. Pairwise comparisons between other members of  
332 *Desulfobulbus sensu stricto* and *Desulfobulbus A* largely show AAI values in the range of 0.6-  
333 0.7, consistent with a single *Desulfobulbus* genus. This, together with generally poor support for  
334 the phylogenetic placement of *D. oralis*, suggests that the relatively high divergence of *D. oralis*  
335 from other members of *Desulfobulbus* may artificially inflate the apparent taxonomic breadth of  
336 strains classified as *Desulfobulbus*. It is currently unclear whether *D. oralis* shows particularly  
337 high divergence given factors relating to adaptation to its unique niche (for *Desulfobulbales*  
338 strains) in the human mouth, because of elevated rates of mutation or horizontal gene transfer  
339 (HGT), or for other reasons. In summary, our results support the reassignment of the  
340 Desulfobulbales to the new taxonomic classification proposed by the GTDB, particularly at the  
341 family level and above. We therefore use GTDB-based clade names (e.g. Desulfobacterota,  
342 Desulfobulbales) throughout.

### 343 344 **Congruence of organismal and sulfur metabolic protein phylogenies in the Desulfobulbales**

345  
346 The distribution of sulfur metabolisms in the Desulfobulbales is scattered, with the capacity for  
347 reduction and disproportionation reactions interspersed in different groups (Figure 3). The  
348 capacity for sulfur disproportionation in particular appears to be polyphyletic. As a result, it is  
349 impossible to confidently assert a simple evolutionary history for sulfur metabolisms in the  
350 Desulfobulbales. Viable scenarios for the history of sulfur metabolisms in this clade could  
351 include, for instance, (1) an ancestor capable of both sulfate reduction and sulfur  
352 disproportionation followed by loss of either metabolism in many lineages, (2) an ancestor  
353 capable of sulfate reduction but not sulfur disproportionation, followed by convergent evolution  
354 of sulfur disproportionation, with or without loss of sulfate reduction, in many lineages and  
355 independently, or (3) the presence of sulfate reduction but not sulfur disproportionation, followed  
356 by a single evolutionary origin of sulfur disproportionation and ensuing HGT to distribute this  
357 metabolism into multiple lineages. More complicated scenarios involving multiple origins,  
358 losses, and horizontal transfers of pathways are also conceivable. Distinguishing between these  
359 scenarios is challenging, particularly given the inability to distinguish between the capacity for

360 sulfate reduction and sulfur disproportionation via genome content alone (Anantharaman et al.,  
361 2018). The capacity for sulfate reduction and sulfur disproportionation is currently determined  
362 only through culture-based characterization; however, the capacity for disproportionation  
363 metabolisms is frequently not determined or reported (Figure 3). As a result, our ability to  
364 interpret the evolutionary history of sulfur metabolisms in the Desulfobulbales is limited.  
365 However, sufficient data is available to draw some conclusions about overall trends.

366  
367 It is well established that sulfur disproportionation utilizes the same basic biochemical pathways  
368 as sulfate reduction, albeit with modifications to enzymes or regulation that allows some steps to  
369 run in reverse (Finster, 2008; Frederiksen and Finster, 2003; Finster et al., 1998; Finster et al.,  
370 2013). Patterns of vertical versus horizontal transfer of components in this pathway should  
371 reflect vertical versus horizontal inheritance of the metabolisms themselves. We therefore  
372 applied methods comparing organismal to functional protein phylogenies to investigate whether  
373 HGT of sulfur metabolizing proteins was responsible for the scattered distribution of sulfur  
374 disproportionation in the Desulfobulbales. If sulfur metabolism proteins (e.g. AprA, DsrA)  
375 phylogenies differ from organismal phylogenies (as determined by concatenated ribosomal  
376 proteins or other markers), this would suggest a history of horizontal gene transfer. Instead, it  
377 appears that sulfur metabolizing proteins have been vertically inherited within the  
378 Desulfobulbales, with few, if any, instances of horizontal gene transfer (Supplemental Figure 2).  
379 Rather, this supports scenarios of multiple instances of convergent evolution of sulfur  
380 disproportionation or, alternatively, the capacity for both sulfur disproportionation and sulfate  
381 reduction in the last common ancestor of the Desulfobulbales followed by many instances of loss  
382 of one pathway. The absence of intra-order HGT of sulfur metabolism pathways is further  
383 supported by the scattered but consistent localization of sulfur metabolisms genes across  
384 Desulfobulbales genomes, preventing straightforward HGT of a single operon or cluster of  
385 genes, but broadly retaining position of particular genes in the genome between members of the  
386 Desulfobulbales (e.g. colocalization of *aprAB* with the anaerobic respiratory complex *qmoABC*).

387  
388 While the antiquity of sulfur disproportionation is not entirely clear, the simplest explanation for  
389 the distribution of sulfate reduction is that this metabolism was present in the last common  
390 ancestor of the Desulfobulbales and was secondarily lost in a few lineages (e.g. *Desulfocapsa*  
391 *sulfexigens*). This scenario is particularly compelling given the broad distribution of sulfate  
392 reduction and the relatively sparse distribution of sulfur disproportionation in the  
393 Desulfobacterota (e.g. Anantharaman et al., 2018). Whether sulfur disproportionation arose  
394 multiple times in different Desulfobulbales lineages or originated once in the stem group of this  
395 clade, it appears to represent convergent evolution with disproportionators in other lineages of  
396 Desulfobacterota and other phyla.

397  
398 **Conclusion**

399

400 The distribution and evolutionary history of MSR and MSD in the Desulfobacterota, and in  
401 microbes in general, is a complex palimpsest of vertical inheritance, occasional horizontal gene  
402 transfer, and extensive convergent evolution. The expanded genomic diversity of the  
403 Desulfobulbales order presented here provides additional context for investigating transitions  
404 between MSR and MSD but is unable to resolve a simple evolutionary history for this process.  
405 While it has long been apparent that sulfur disproportionation is derived from sulfate reduction,  
406 there still exists no unambiguous molecular markers to distinguish the capacity for these  
407 metabolisms from genomic data alone, nor is it clear what ecological or evolutionary processes  
408 underlie the innovation of sulfur disproportionation with or without the concurrent loss of sulfate  
409 reduction. However, the expanded genomic diversity presented here for well-characterized  
410 isolates, coupled with comparative phylogenetic approaches, can provide significant insight into  
411 the history of the Desulfobulbales. In this group, it is clear that the ancestral phenotype is of  
412 sulfate reduction, with multiple, convergent transitions to sulfur disproportionation either with or  
413 without the concurrent loss of sulfate reduction. This is in line with earlier work that supported  
414 the derivation of MSD from MSR (Canfield and Teske, 1996; Habicht and Canfield, 1998; Shen  
415 et al., 2001; Johnston et al., 2005; Philippot et al., 2007; Fike et al., 2015). By demonstrating the  
416 vertical inheritance of sulfur metabolic genes in the Desulfobulbales, we can rule out a major  
417 role for horizontal gene transfer in the distribution of MSD across the diversity of this clade.  
418 While the precise biochemical mechanisms and ecological triggers for the transition from MSR  
419 to MSD in this clade are still unknown, the propensity for the Desulfobulbales to invent and  
420 reinvent MSD may be related to a genomic background that includes pre-adaptations to marginal  
421 redox environments (e.g. presence of pathways for O<sub>2</sub> detoxification) as well as alleles that allow  
422 more ready reversibility of key enzymes (e.g. the truncated AprB tail; Bertran, 2019). Further  
423 determination of markers for MSD in the Desulfobulbales and other organisms will require more  
424 thorough characterization and reporting of the capacity for disproportionation in sulfate reducing  
425 strains to reduce the burden of missing data (e.g. Fig. 3) and to better allow thorough  
426 comparative genomics to identify genetic differences between disproportionator and non  
427 disproportionator lineages.

428  
429 The apparent phenotypic plasticity between MSR and MSD over relatively short evolutionary  
430 timescales (i.e. species- or genus-level variability, versus evolution over family or higher longer  
431 timescales as is typically seen in other metabolic traits like phototrophy and carbon fixation, e.g.  
432 Shih et al. 2017, Ward and Shih 2020) has significant implications for our understanding of the  
433 roles of these metabolisms in Earth history. If sulfate reducing microbes can readily and  
434 independently evolve the capacity for disproportionation, this suggests that this process may  
435 occur frequently in diverse lineages over geologic time. As a result, it is likely that sulfur  
436 disproportionating microbes have been present for as much of Earth history as there have been  
437 appropriate redox gradients in marine sediments and other environments — but, importantly,  
438 these likely have consisted of different, unrelated lineages at different times in Earth history. It is  
439 therefore reasonable to assume the activity of MSD in shaping sulfur isotopes and other

440 sedimentary records from periods of Earth's past, but it may not be possible to assume  
441 taxonomic affinity or other traits of the organisms responsible.

442  
443 While expanded genomic sampling of the Desulfobulbales can improve our current  
444 understanding of the taxonomic and phylogenetic relationships in this clade, it is insufficient to  
445 fully untangle trends and processes in the evolutionary relationships between MSR and MSD. A  
446 major barrier to our understanding of these processes is our inability to distinguish the capacity  
447 for these metabolisms from genome content alone. Isolation and extensive physiological  
448 characterization of the sulfur metabolism capacity for Desulfobulbales strains continues to be  
449 essential; this includes the successful isolation of novel organisms in this clade (e.g. the  
450 enigmatic cable bacteria) but also the thorough testing and reporting of the sulfur  
451 disproportionation capacity for existing isolates (i.e. filling in the extensive "Not Reported"  
452 entries in Table 1 and Figure 3). Alternatively, identifying robust and consistent genomic  
453 markers to distinguish MSR from MSD may allow more accurate screening of the metabolic  
454 capacity of microorganisms from genome content alone in the absence of characterized isolates.  
455 Such markers have not yet been identified but are a target of active investigation (e.g., Umezawa  
456 et al., 2020). Finally, purely phylogenetic approaches to understanding the evolution of sulfur  
457 cycling in the Desulfobulbales provide an understanding of the timing of these processes only in  
458 relative evolutionary time. Tying this understanding to absolute, geologic time will require the  
459 application of additional approaches such as molecular clock analyses or calibrations using  
460 sediment geochemical and stable isotope records.

461  
462 **Data Availability:** All data utilized in this study is publicly available in the NCBI Genbank and  
463 WGS databases. Genomes first described here are available under submission ID SUB8971597  
464 and will be released immediately following processing.

465  
466 **Acknowledgements:** Genomic DNA was acquired from the  
467 Deutsche Sammlung von Mikroorganismen und Zellkulturen (DSMZ). Genome sequencing was  
468 provided by MicrobesNG (<http://www.microbesng.uk>) which is supported by the BBSRC (grant  
469 number BB/L024209/1). EB and DTJ acknowledge support from NASA Exobiology  
470 (NNX15AP58G). This work was supported by a grant from the Simons Foundation (Grant  
471 Number 653687, LMW).

472  
473 **Figures and tables**

474  
475 **Tables**

476  
477 **Table 1:** Genome statistics

478  
479 **Figures**

480  
481

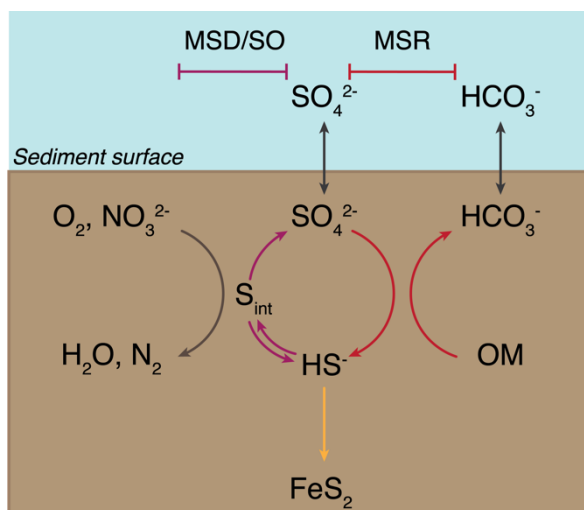

482  
483

484 **Figure 1:** Sedimentary biogeochemical sulfur cycle. The sediment-water interface is indicated at  
485 the “Sediment surface”. First, seawater sulfate ( $\text{SO}_4^{2-}$ ) diffuses into the sediments and enters the  
486 reductive sulfur cycle promoted by microbial sulfate reduction (MSR) (indicated with red  
487 arrows), which couples the reduction of sulfate to sulfide ( $\text{HS}^-$ ) to the oxidation of organic matter  
488 (OM). A fraction of the produced sulfide precipitates with iron to form pyrite ( $\text{FeS}_2$ ) and is  
489 ultimately buried (yellow arrow). A portion of biogenic sulfide is oxidized – either biotically  
490 through sulfide oxidation (SO, shown with a blue arrow) or abiotically – using common oxidants  
491 – oxygen ( $\text{O}_2$ ) or nitrate ( $\text{NO}_3^{2-}$ ) – to yield intermediate sulfur species ( $\text{S}_{\text{int}}$ ). These are then  
492 disproportionated via microbial sulfur disproportionation (MSD) to release sulfate and sulfide  
493 (depicted with a purple arrow).

494

495 **Figure 2:** (A) Tree of Life built with concatenated ribosomal proteins following Hug *et al.*  
496 (2016) collapsed at the phylum level as classified by GTDB-Tk showing the relationship of  
497 Desulfobacterota relative to Proteobacteria and other major bacterial groups. (B) Concatenated  
498 ribosomal protein phylogeny of the Desulfobacterota binned at the family (Desulfobulbales) or  
499 class (all other lineages) levels, labeled with taxonomic assignments from GTDB-Tk, showing  
500 the placement of and relationships within the Desulfobulbales. Nodes are labeled with TBE  
501 support values.

502

503 **Figure 3:** Phylogenetic tree showing the genomes of isolated and well-characterized members of  
504 the Desulfobulbales, including the families Desulfobulbaceae, Desulfocapsaceae, and  
505 Desulfurivibrionaceae. Nodes are labeled with TBE support values. Species names are  
506 highlighted with colors corresponding to the taxonomic family to which they are assigned. On  
507 the right, the characterized capacity for performing sulfur metabolisms is indicated.

508

509  
510  
511

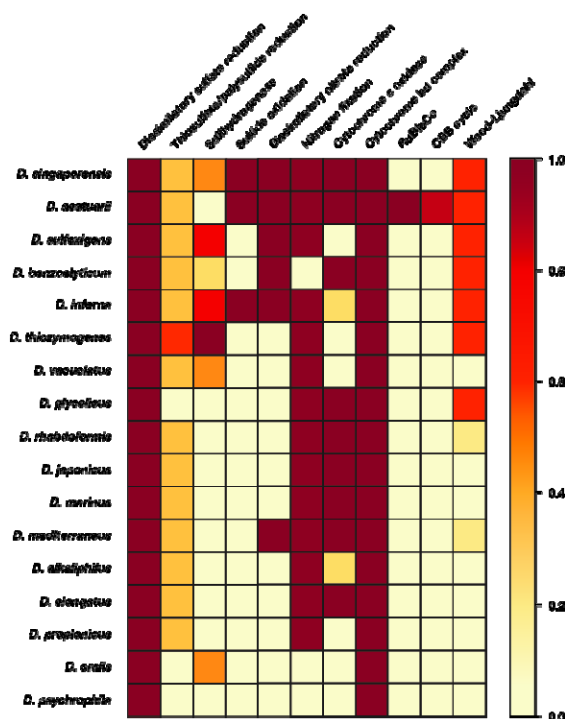

512  
513

514 **Figure 4:** Heatmap of metabolic functions produced by the KEGG-decoder of the members of  
515 the Desulfobulbales sequenced here. The color gradient reflects the fractional abundance of  
516 genes associated with a pathway encoded by a particular genome. In other words, white implies  
517 no genes associated with a pathway of interest are found in the genome and thus that said  
518 pathway is no constituted. Conversely, dark red indicates all genes required to perform the  
519 pathway of interest are found and that said metabolism is fully constituted in the genome.  
520 Implications for the presence or absence of metabolic pathways of interest in each genome are  
521 discussed in the text.

522

## 523 References

524

525 1. Anantharaman, K., Hausmann, B., Jungbluth, S. P., Kantor, R. S., Lavy, A., Warren, L. A., *et*  
526 *al.* (2018) Expanded diversity of microbial groups that shape the dissimilatory sulfur  
527 cycle *The ISME Journal* **12(7)**, pp. 1715-1728 DOI: 10.1038/s41396-018-0078-0

528

529 2. Aziz, R. K., Bartels, D., Best, A. A., DeJongh, M., Disz T., Edwards, R.A., *et al.* (2008) The  
530 RAST Server: rapid annotations using subsystems technology *BMC genomics* **9(1)**, 75

531

- 532 3. Bankevich, A., Nurk, S., Antipov, D., Gurevich, A. A., Dvorkin, M., Kulikov, A. S., *et al.*  
533 (2012) SPAdes: A New Genome Assembly Algorithm and Its Applications to Single-Cell  
534 Sequencing *Journal of Computational Biology* **19(5)**, 455–477 DOI: 10.1089/cmb.2012.0021  
535
- 536 4. Berner, R. and Canfield, D. (1989) A new model for atmospheric oxygen over Phanerozoic  
537 time. *American Journal Of Science* **289, 4**, 333–361  
538
- 539 5. Berner, R. A., Raiswell, R. (1984) C/S method for distinguishing freshwater from marine  
540 sedimentary rocks *Geology* **12(6)**: 365-368 DOI: 10.1130/0091-  
541 7613(1984)12<365:CMFDFD>2.0.CO;2  
542
- 543 6. Bertran, E., Leavitt, W. D., Pellerin, A., Zane, G. M., Wall, J. D., Halevy, I., Wing, B. A., and  
544 Johnston, D. T. (2018) Deconstructing the dissimilatory sulfate reduction pathway: Isotope  
545 fractionation of a mutant unable of growth on sulfate. *Frontiers in Microbiology* **9** DOI:  
546 10.3389/fmicb.2018.03110  
547
- 548 7. Bertran, E. (2019) *Cellular and intracellular insights into microbial sulfate reduction and*  
549 *sulfur disproportionation* PhD dissertation. Harvard University, Cambridge, MA  
550
- 551 8. Bertran, E., Ward, L. M., Johnston, D. T. (2020a) Draft Genome Sequence of *Acidianus*  
552 *ambivalens* DSM 3772, an Aerobic Thermoacidophilic Sulfur Disproportionator *Microbiology*  
553 *Resource Announcements* **9(3)** DOI: 10.1128/MRA.01415-19  
554
- 555 9. Bertran, E., Ward, L. M., Johnston, D. T. (2020b) Draft Genome Sequence of  
556 *Desulfobacterium thermobenzoicum* subsp. *thermosyntrophicum* DSM 14055, a Moderately  
557 Thermophilic Sulfate Reducer *Microbiology Resource Announcements* **9(3)** DOI:  
558 10.1128/MRA.01416-19  
559
- 560 10. Bertran, E., Ward, L. M., Johnston, D. T. (2020c) Draft Genome Sequence of  
561 *Desulfobacter hydrogenophilus* DSM 3380, a Psychrotolerant Sulfate-Reducing  
562 Bacterium *Microbiology Resource Announcements* **9(14)** DOI: 10.1128/MRA.00203-20  
563
- 564 11. Bolger, A. M., Lohse, M., Usadel, B. (2014) Trimmomatic: a flexible trimmer for  
565 Illumina sequence data *Bioinformatics* **30(15)**, 2114–2120 DOI:  
566 10.1093/bioinformatics/btu170  
567
- 568 12. Bontognali, T. R., Sessions, A. L., Allwood, A. C., Fischer, W. W., Grotzinger, J. P.,  
569 Summons, R. E. and Eiler, J. M. (2012) Sulfur isotopes of organic matter preserved in 3.45-  
570 billion-year-old stromatolites reveal microbial metabolism. *Proceedings of the National*  
571 *Academy of Sciences*, **109(38)**, pp.15146-15151 DOI: 10.1073/pnas.1207491109

- 572  
573 **13.** Böttcher, M. E., Thamdrup, B., Gehre, M., Theune, A. (2005)  $^{34}\text{S}/^{32}\text{S}$  and  $^{18}\text{O}/^{16}\text{O}$   
574 Fractionation During Sulfur Disproportionation by *Desulfobulbus propionicus*  
575 *Geomicrobiology Journal* **Vol. 22(5)**, pp. 219-226 DOI: 10.1080/01490450590947751  
576
- 577 **14.** Bowers, R. M., Kyrpides, N. C., Stepanauskas, R., Harmon-Smith, M., Doud, D., Reddy,  
578 T. B. K., *et al.* (2017) Minimum information about a single amplified genome (MISAG) and a  
579 metagenome-assembled genome (MIMAG) of bacteria and archaea *Nature*  
580 *biotechnology* **35(8)**, pp. 725-731 DOI: 10.1038/nbt.3893  
581
- 582 **15.** Bradley, A. S., Leavitt, W. D., Schmidt, M., Knoll, A. H., Girguis, P. R. and Johnston, D.  
583 T. (2016) Patterns of sulfur isotope fractionation during microbial sulfate reduction.  
584 *Geobiology* **14**: 91-101 DOI:10.1111/gbi.12149  
585
- 586 **16.** Camacho, C., Coulouris, G., Avagyan, V., Ma, N., Papadopoulos, J., Bealer, K., Madden,  
587 T. L. (2009) "BLAST+: architecture and applications" *Bmc Bioinformatics* **10**: 421 DOI:  
588 10.1186/1471-2105-10-421  
589
- 590 **17.** Canfield, D. E., Thamdrup, B. (1994) The production of  $^{34}\text{S}$ -depleted sulfide during  
591 bacterial disproportionation of elemental sulfur *Science (New York, N.Y.)* **266** DOI:  
592 10.1126/science.11540246  
593
- 594 **18.** Canfield, D. E., Teske, A. (1996) Late Proterozoic rise in atmospheric oxygen  
595 concentration inferred from phylogenetic and sulphur-isotope studies *Nature* **382**, 6587 DOI:  
596 10.1038/382127a0  
597
- 598 **19.** Canfield, D. E., Thamdrup, B., Fleischer, S. (1998) Isotope fractionation and sulfur  
599 metabolism by pure and enrichment cultures of elemental sulfur disproportionating bacteria  
600 *Limnology and Oceanography* **Vol.43(2)**, pp. 253-264 DOI: 10.4319/lo.1998.43.2.0253  
601
- 602 **20.** Canfield, D. (2001) Isotope fractionation by natural populations of sulfate-reducing  
603 bacteria *Geochimica et Cosmochimica Acta* **65**, 7, 1117–1124 DOI: 10.1016/S0016-  
604 7037(00)00584-6  
605
- 606 **21.** Chaumeil, P. A., Mussig, A. J., Hugenholtz, P., Parks, D. H. (2019) GTDB-Tk: a toolkit  
607 to classify genomes with the Genome Taxonomy Database *Bioinformatics* **Volume 36**, Issue  
608 **6**, Pages 1925–1927 DOI: 10.1093/bioinformatics/btz848  
609
- 610 **22.** Cross, K. L., Chirania, P., Xiong, W., Beall, C. J., Elkins, J. G., Giannone, R. J., *et al.*  
611 (2018) Insights into the Evolution of Host Association through the Isolation and



- 612 Characterization of a Novel Human Periodontal Pathobiont, *Desulfobulbus oralis*, *mBio* **Vol.**  
613 **9(2)** DOI: 10.1128/mBio.02061-17  
614
- 615 **23.** Doolittle, R. F. (1986) *Of Urfs And Orfs: Primer On How To Analyze Derived Amino*  
616 *Acid Sequences* Mill Valley, CA: University Science Books.  
617
- 618 **24.** Edgar, R. C. (2004) MUSCLE: multiple sequence alignment with high accuracy and high  
619 throughput *Nucleic Acids Research* **32**, **1792–1797** DOI: 10.1093/nar/gkh340  
620
- 621 **25.** El Houari, A., Ranchou-Peyruse, M., Ranchou-Peyruse, A., Dakdaki, A., Guignard, M.,  
622 Idouhammou, L., *et al.* (2017) *Desulfobulbus oligotrophicus* sp. nov., a sulfate-reducing and  
623 propionate-oxidizing bacterium isolated from a municipal anaerobic sewage sludge digester  
624 *International journal of systematic and evolutionary microbiology* **Vol. 67(2)**, **pp. 275-281**  
625 DOI: 10.1099/ijsem.0.001615  
626
- 627 **26.** Fike, D., Bradley, A., Rose, C. (2015) Rethinking the ancient sulfur cycle *Annual Review*  
628 *of Earth and Planetary Sciences* **43** DOI: 10.1146/annurev-earth-060313-054802  
629
- 630 **27.** Finster, K., Liesack, W., Thamdrup, B. (1998) Elemental Sulfur and Thiosulfate  
631 Disproportionation by *Desulfocapsa sulfoexigens* sp. nov., a New Anaerobic Bacterium  
632 Isolated from Marine Surface Sediment *Applied and Environmental Microbiology* **Vol. 64(1)**,  
633 **p. 119** DOI: 10.1128/AEM.64.1.119-125.1998  
634
- 635 **28.** Finster, K. (2008) Microbiological disproportionation of inorganic sulfur compounds  
636 *Journal of Sulfur Chemistry* **Vol. 29(3-4)**, **pp. 281-292** DOI: 10.1080/17415990802105770  
637
- 638 **29.** Finster, K. W., Kjeldsen, K. U., Kube, M., Reinhardt, R., Musmann, M., Amann, R.,  
639 Schreiber L. (2013) Complete genome sequence of *Desulfocapsa sulfexigens*, a marine  
640 deltaproteobacterium specialized in disproportionating inorganic sulfur compounds *Standards*  
641 *in genomic sciences* **8, 1** DOI: 10.4056/sigs.3777412  
642
- 643 **30.** Frederiksen, T.-M., Finster, K. (2003) Sulfite-oxido-reductase is involved in the  
644 oxidation of sulfite in *Desulfocapsa sulfoexigens* during disproportionation of thiosulfate and  
645 elemental sulfur *Biodegradation* **14, 3**, **189–198** DOI: 10.1023/A:1024255830925  
646
- 647 **31.** Fry, B., Cox, J., Gest, H. and Hayes, J. M. (1986) Discrimination between <sup>34</sup>S and <sup>32</sup>S  
648 during bacterial metabolism of inorganic sulfur compounds. *J Bacteriol* **165(1):328–30**, **1**  
649 DOI: 10.1128/jb.165.1.328-330.1986  
650

- 651 **32.** Fuseler, K. and Cypionka, H. (1995) Elemental sulfur as an intermediate of sulfide  
652 oxidation with oxygen by *Desulfobulbus propionicus* *Archives of Microbiology* **164:104–109**  
653 DOI: 10.1007/BF02525315  
654
- 655 **33.** Gittel, A., Seidel, M., Kuever, J., Galushko, A. S., Cypionka, H., Konneke, M. (2010)  
656 *Desulfopila inferna* sp. nov., a sulfate-reducing bacterium isolated from the subsurface of a  
657 tidal sand-flat *International Journal of Systematic and Evolutionary Microbiology* **60, 1626–**  
658 **1630** DOI: 10.1099/ijs.0.015644-0  
659
- 660 **34.** Graham, E. D., Heidelberg, J. F., Tully, B. J. (2018) Potential for primary productivity in  
661 a globally-distributed bacterial phototroph *ISME Journal* **350, 1–6** DOI: 10.1038/s41396-018-  
662 0091-3  
663
- 664 **35.** Habicht, K. S. and Canfield, D. E. (1998) Sulfur isotope fractionation during bacterial  
665 reduction and disproportionation of thiosulfate and sulfite *Geochimica et Cosmochimica Acta*  
666 **Vol. 62(15), pp. 2585-2595** DOI: 10.1016/S0016-7037(98)00167-7  
667
- 668 **36.** Habicht, K. S., Gade, M., Thamdrup, B., Berg, P., and Canfield, D. E. (2002) Calibration  
669 of sulfate levels in the Archean ocean. *Science (New York, N.Y.)* **298, 5602** DOI:  
670 10.1126/science.1078265
- 671 **37.** Hemp, J., Ward, L. M., Pace, L. A. and Fischer, W. W. (2015) Draft genome sequence of  
672 *Levilinea saccharolytica* KIBI-1, a member of the Chloroflexi class Anaerolineae. *Genome*  
673 *announcements*, **3(6)** DOI: 10.1128/genomeA.01357-15  
674
- 675 **38.** Hyatt, D., Chen, G. L., LoCascio, P. F., Land, M. L., Larimer, F. W. and Hauser, L. J.  
676 (2010) Prodigal: prokaryotic gene recognition and translation initiation site  
677 identification. *BMC bioinformatics*, **11(1), p.119**. DOI: 10.1186/1471-2105-11-119  
678
- 679 **39.** Isaksen, M. F. and Teske, A. (1996) *Desulforhopalus vacuolatus* gen. nov., sp. nov., a  
680 new moderately psychrophilic sulfate-reducing bacterium with gas vacuoles isolated from a  
681 temperate estuary *Archives of Microbiology* **Vol. 166(3), pp. 160-168** DOI:  
682 10.1007/s002030050371  
683
- 684 **40.** Janssen, P. H., Schuhmann, A., Bak, F., Liesack, W. (1996) Disproportionation of  
685 inorganic sulfur compounds by the sulfate-reducing bacterium *Desulfocapsa thiozymogenes*  
686 gen. nov., sp. nov. *Archives of Microbiology* **Vol. 166(3), pp. 184-192** DOI:  
687 10.1007/s002030050374  
688
- 689 **41.** Junghare, M. and Schink, B. (2015) *Desulfoprimum benzoelyticum* gen. nov., sp. nov., a  
690 Gram-stain-negative, benzoate-degrading, sulfate-reducing bacterium isolated from a

- 691 wastewater treatment plant *International journal of systematic and evolutionary microbiology*  
692 **Vol. 65(Pt 1), pp. 77-84** DOI: 10.1099/ijss.0.066761-0  
693
- 694 **42.** Johnston, D. T., Poulton, S. W., Fralick, P. W., Wing, B. A., Canfield, D. E. and  
695 Farquhar J. (2005) Evolution of the oceanic sulfur cycle at the end of the Paleoproterozoic  
696 *Geochimica et Cosmochimica Acta* **Vol. 70(23), pp. 5723-5739** DOI:  
697 10.1016/j.gca.2006.08.001  
698
- 699 **43.** Kanehisa, M., Sato, Y., and Morishima, K. (2016) BlastKOALA and GhostKOALA:  
700 KEGG tools for functional characterization of genome and metagenome sequences *Journal of*  
701 *Molecular Biology* **428, 726-731** DOI: 10.1016/j.jmb.2015.11.006  
702
- 703 **44.** Keller, K. L. and Wall, J. D. (2011) Genetics and molecular biology of the electron flow  
704 for sulfate respiration in *Desulfovibrio* *Frontiers in Microbiology* **Vol. 2, pp. 135** DOI:  
705 10.3389/fmicb.2011.00135  
706
- 707 **45.** Kjeldsen, K. U., Schreiber, L., Thorup, C. A., Boesen, T., Bjerg, J. T., Yang, T., *et al.*  
708 (2019) On the evolution and physiology of cable bacteria *Proceedings of the National*  
709 *Academy of Sciences* **116 (38) 19116-19125** DOI: 10.1073/pnas.1903514116  
710
- 711 **46.** Knoblauch, C., Sahm, K., Jorgensen, B. (1999) Psychrophilic sulfate-reducing bacteria  
712 isolated from permanently cold Arctic marine sediments: description of *Desulfofrigus*  
713 *oceanense* gen.nov., sp. nov., *Desulfofrigus fragile* sp. nov., *Desulfofaba gelida* gen. nov., sp.  
714 nov., *Desulfotalea psychrophila* gen. nov., sp. nov. and *Desulfotalea arctica* sp. nov  
715 *International Journal of Systematic Bacteriology* **Vol. 49(4), pp. 1631-1643** DOI:  
716 10.1099/00207713-49-4-1631  
717
- 718 **47.** Kramer, M. and Cypionka, H. (1989) Sulfate formation via ATP sulfurylase in  
719 thiosulfate- and sulfite-disproportionating bacteria *Archives of Microbiology* **151:232-237**  
720 DOI: 10.1007/BF00413135  
721
- 722 **48.** Kuever, J., Rainey, F. A., Widdel, F. (2005) Genus I *Desulfobulbus*. In: Brenner DJ,  
723 Krieg NR, Staley JT, Garrity GM (eds) *Bergey's manual of systematic bacteriology*, vol 2,  
724 2nd edn, (The Proteobacteria), part C (The Alpha-, Beta-, Delta-, and Epsilonproteobacteria)  
725 *Springer, New York, pp. 988-92*  
726
- 727 **49.** Kuever, J. (2014) The Family *Desulfobulbaceae*. In: Rosenberg, E., DeLong, E. F., Lory,  
728 S., Stackebrandt, E., Thompson, F., (eds) *The Prokaryotes*. Springer, Berlin, Heidelberg  
729

- 730 **50.** Leavitt, W. D., Halevy, I., Bradley, A. S., Johnston, D. T. (2013) Sulfur isotopes record  
731 Phanerozoic redox shift *Proceedings of the National Academy of Sciences* **110 (28) 11244-**  
732 **11249** DOI: 10.1073/pnas.1218874110  
733
- 734 **51.** LeGall, J., Fauque, G. (1988) Dissimilatory reduction of sulfur compounds, ed. A. J. B.  
735 Zehnder, Wiley, New York, *Biology of Anaerobic Microorganisms* **587–639**  
736
- 737 **52.** Lemoine, F., Entfellner, J. B. D., Wilkinson, E., Correia, D., Felipe, M. D., Oliveira, T.  
738 and Gascuel, O. (2018) Renewing Felsenstein’s phylogenetic bootstrap in the era of big  
739 data *Nature* **556(7702), p. 452** DOI: 10.1038/s41586-018-0043-0  
740
- 741 **53.** Letunic, I. and Bork, P. (2016) Interactive tree of life (iTOL) v3: an online tool for the  
742 display and annotation of phylogenetic and other trees *Nucleic Acids Research* **44.W1,**  
743 **W242–W245** DOI: 10.1093/nar/gkw290  
744
- 745 **54.** Lie, T. J., Clawson, M. L., Godchaux, W., Leadbetter, E. R. (1999) Sulfidogenesis from  
746 2-Aminoethanesulfonate (Taurine) Fermentation by a Morphologically Unusual Sulfate-  
747 Reducing Bacterium, *Desulforhopalus singaporensis* sp. nov. *Applied and Environmental*  
748 *Microbiology* **Vol. 65(8), p. 3328** DOI: 10.1128/AEM.65.8.3328-3334.1999  
749
- 750 **55.** Lien, T., Madsen, M., Steen, I. H., Gjerdevik, K. (1998) *Desulfobulbus rhabdoformis* sp.  
751 nov., a sulfate reducer from a water–oil separation system *International Journal of Systematic*  
752 *Bacteriology* **48:469–474** DOI: 10.1099/00207713-48-2-469  
753
- 754 **56.** Lovley, D. R. and Phillips, E. J. P. (1994) Novel processes for anaerobic sulfate  
755 production from elemental sulfur by sulfate-reducing bacteria *Applied and Environmental*  
756 *Microbiology* **60:2394–2399**  
757
- 758 **57.** Miller, M. A., Pfeiffer, W. and Schwartz, T. (2010) "Creating the CIPRES Science  
759 Gateway for inference of large phylogenetic trees" in *Proceedings of the Gateway Computing*  
760 *Environments Workshop (GCE)*, 14 Nov. 2010, New Orleans, LA pp. 1 - 8  
761
- 762 **58.** Müller, H., Bosch, J., Griebler, C. *et al.* (2016) Long-distance electron transfer by cable  
763 bacteria in aquifer sediments *The ISME Journal* **10, 2010–2019** DOI: 10.1038/ismej.2015.250  
764
- 765 **59.** Müller, H., Marozava, S., Probst, A.J. *et al.* (2020) Groundwater cable bacteria conserve  
766 energy by sulfur disproportionation *The ISME Journal* **14, 623–634** DOI: 10.1038/s41396-  
767 019-0554-1  
768

- 769 **60.** Pace, L. A., Hemp, J., Ward, L. M. and Fischer, W. W. (2015) Draft genome of  
770 *Thermanaerotherrix daxensis* GNS-1, a thermophilic facultative anaerobe from the Chloroflexi  
771 class Anaerolineae. *Genome announcements*, **3(6)** DOI: 10.1128/genomeA.01354-15  
772
- 773 **61.** Parey, K., Fritz, G., Ermler, U., Kroneck, P. M. H. (2013) Conserving energy with sulfate  
774 around 100°C-structure and mechanism of key metal enzymes in hyperthermophilic  
775 archaeoglobus fulgidus. *Metallomics* **5 (4)** 302–317 DOI: 10.1039/c2mt20225e  
776
- 777 **62.** Parks, D. H., Imelfort, M., Skennerton, C. T., Hugenholtz, P. and Tyson, G. W. (2015)  
778 CheckM: assessing the quality of microbial genomes recovered from isolates, single cells, and  
779 metagenomes *Genome research* **25(7)**, 1043-1055 DOI: 10.1101/gr.186072.114  
780
- 781 **63.** Parks, D. H., Chuvochina, M., Waite, D. W., Rinke, C., Skarshewski, A., Chaumeil, P. A.  
782 and Hugenholtz, P. (2018) A standardized bacterial taxonomy based on genome phylogeny  
783 substantially revises the tree of life *Nature biotechnology* **36**, 996-1004 DOI:  
784 10.1038/nbt.4229  
785
- 786 **64.** Pereira, I. A. C., Ramos, A. R., Grein, F., Marques, M. C., Marques da Silva, S.,  
787 Venceslau, S. S. (2011) A comparative genomic analysis of energy metabolism in sulfate  
788 reducing bacteria and archaea *Frontiers of Microbiology* **2**, 69 DOI:  
789 10.3389/fmicb.2011.00069  
790
- 791 **65.** Pfeffer, C., Larsen, S., Song, J., Dong, M., Besenbacher, F., Meyer, R. L., *et al.* (2012)  
792 Filamentous bacteria transport electrons over centimetre distances *Nature* **491:218 –221** DOI:  
793 10.1038/nature11586  
794
- 795 **66.** Philippot, P., Van Zuilen, M., Lepot, K., Thomazo, C., Farquhar J. and Van Kranendonk  
796 M. J. (2007) Early archaean microorganisms preferred elemental sulfur, not sulfate *Science*  
797 (*New York, N.Y.*) **317**, 5844 DOI: 10.1126/science.1145861  
798
- 799 **67.** Rinke, C., Chuvochina, M., Mussig, A. J., Chaumeil, P. A., Waite, D. W., Whitman, W.  
800 B., *et al.* (2020) A rank-normalized archaeal taxonomy based on genome phylogeny resolves  
801 widespread incomplete and uneven classifications *bioRxiv*  
802
- 803 **68.** Rodriguez-R, L. M. and Konstantinidis, K. T. (2014) Bypassing cultivation to identify  
804 bacterial species *Microbe* **9(3)**, pp. 111-118  
805
- 806 **69.** Rosenberg, E. (Editor-in-Chief), DeLong, E. L., Lory, S., Stackebrandt, E., Thompson, F.  
807 (Eds.) (2014) The Prokaryotes – Deltaproteobacteria and Epsilonproteobacteria *Springer-*  
808 *Verlag Berlin Heidelberg* DOI 10.1007/978-3-642-39044-9\_267

- 809  
810 **70.** Samain, E., Dubourguier, H. C., Albagnac, G. (1984) Isolation and characterisation of  
811 *Desulfobulbus elongatus* sp. nov. from a mesophilic industrial digester *Systematic and*  
812 *Applied Microbiology* **5:391–401** DOI: 10.1016/S0723-2020(84)80040-5  
813  
814 **71.** Sass, A., Rutter, H., Cypionka, H., Sass, H. (2002) *Desulfobulbus mediterraneus* sp. nov.,  
815 a sulfate-reducing bacterium growing on mono- and disaccharides. *Archives of Microbiology*  
816 **177:468–474** DOI: 10.1007/s00203-002-0415-5  
817  
818 **72.** Schauer, R., Risgaard-Petersen, N., Kjeldsen, K. U., Tataru Bjerg, J. J., Jørgensen, B. B.,  
819 Schramm, A., Nielsen, L. P. (2014) Succession of cable bacteria and electric currents in  
820 marine sediment *The ISME Journal* **8:1314–1322** DOI: 10.1038/ismej.2013.239  
821  
822 **73.** Shen, Y., Buick, R. and Canfield, D. E. (2001) Isotopic evidence for microbial sulphate  
823 reduction in the early Archaean era *Nature* **410, 6824** DOI: 10.1038/35065071  
824  
825 **74.** Shih, P. M., Ward, L. M. and Fischer, W. W. (2017) Evolution of the 3-  
826 hydroxypropionate bicycle and recent transfer of anoxygenic photosynthesis into the  
827 Chloroflexi. *Proceedings of the National Academy of Sciences*, **114(40)**, pp.10749-10754  
828 DOI: 10.1073/pnas.1710798114  
829  
830 **75.** Søndergaard, D., Pedersen, C. N. and Greening, C. (2016) HydDB: a web tool for  
831 hydrogenase classification and analysis *Scientific reports*, **6, 34212** DOI: 10.1038/srep34212  
832  
833 **76.** Sorokin, D. Y., Tourova, T. P., Panteleeva, A. N., Muyzer G. (2012)  
834 *Desulfonatrobacter acidivorans* gen. nov., sp. nov. and *Desulfobulbus alkaliphilus* sp. nov.  
835 haloalkaliphilic heterotrophic sulfate-reducing bacteria from soda lakes *International Journal*  
836 *of Systematic and Evolutionary Microbiology* **62:2107–2113** DOI: 10.1099/ijs.0.029777-0  
837  
838 **77.** Stamatakis, A. (2014) RAxML version 8: a tool for phylogenetic analysis and post-  
839 analysis of large phylogenies *Bioinformatics* **30(9): 1312-1313** DOI:  
840 10.1093/bioinformatics/btu033.  
841  
842 **78.** Suzuki, D., Ueki, A., Amaishi, A., Ueki, K. (2007) *Desulfobulbus japonicus* sp. nov., a  
843 novel Gram-negative, propionate-oxidizing, sulfate-reducing bacterium isolated from an  
844 estuarine sediment in Japan *International Journal of Systematic and Evolutionary*  
845 *Microbiology* **57:849–855** DOI: 10.1099/ijs.0.64855-0  
846  
847 **79.** Suzuki, D., Ueki, A., Amaishi, A., Ueki, K. (2007) *Desulfopila aestuarii* gen. nov., sp.  
848 nov., a Gram-negative, rod-like, sulfate-reducing bacterium isolated from an estuarine

- 849 sediment in Japan *International Journal of Systematic and Evolutionary Microbiology* **Vol.**  
850 **57(3)**, pp. 520-526 DOI: 10.1099/ijs.0.64600-0
- 851
- 852 **80.** Thamdrup, B., Finster, K., Hansen, J. W. and Bak, F. (1993) Bacterial disproportionation  
853 of elemental sulfur coupled to chemical reduction of iron or manganese *Applied and*  
854 *Environmental Microbiology* **59, 1**
- 855
- 856 **81.** Umezawa, K., Kojima, H., Kato, Y. and Fukui, M. (2020) Disproportionation of  
857 inorganic sulfur compounds by a novel autotrophic bacterium belonging to  
858 Nitrospirota *Systematic and Applied Microbiology* **43(5): pp.126110** DOI:  
859 10.1016/j.syapm.2020.126110
- 860
- 861 **82.** Waite, D.W., Chuvochina, M., Pelikan, C., Parks, D.H., Yilmaz, P., Wagner, M., Loy, A.,  
862 Naganuma, T., Nakai, R., Whitman, W.B. and Hahn, M.W. (2020) Proposal to reclassify the  
863 proteobacterial classes Deltaproteobacteria and Oligoflexia, and the phylum  
864 Thermodesulfobacteria into four phyla reflecting major functional capabilities. *International*  
865 *Journal of Systematic and Evolutionary Microbiology*, **70(11)** DOI: 10.1099/ijsem.0.004213
- 866
- 867 **83.** Ward, L. M., Hemp, J., Pace, L. A. and Fischer, W. W. (2015) Draft genome sequence of  
868 *Leptolinea tardivitalis* YMTK-2, a mesophilic anaerobe from the Chloroflexi class  
869 Anaerolineae. *Genome announcements*, **3(6)** DOI: 10.1128/genomeA.01356-15
- 870
- 871 **84.** Ward, L. M., Shih, P. M. and Fischer, W. W. (2018) MetaPOAP: presence or absence of  
872 metabolic pathways in metagenome-assembled genomes. *Bioinformatics* **34(24)**, **4284-4286**  
873 DOI: 10.1093/bioinformatics/bty510
- 874
- 875 **85.** Ward, L. M., Hemp, J., Shih, P. M., McGlynn, S. E., and Fischer, W. W. (2018b)  
876 Evolution of Phototrophy in the Chloroflexi Phylum Driven by Horizontal Gene  
877 Transfer *Frontiers in Microbiology* **9, 260** DOI: 10.3389/fmicb.2018.00260
- 878
- 879 **86.** Ward, L. M., and Shih, P. M. (2019) The evolution and productivity of carbon fixation  
880 pathways in response to changes in oxygen concentration over geological time *Free Radical*  
881 *Biology and Medicine* **140**, pp.188-199 DOI: 10.1016/j.freeradbiomed.2019.01.049
- 882
- 883 **87.** Ward, L. M., Bertran, E. and Johnston, D. T. (2020a) Draft Genome Sequence of  
884 *Desulfovibrio sulfodismutans* ThAc01, a Heterotrophic Sulfur-Disproportionating Member of  
885 the Desulfobacterota *Microbiology Resource Announcements* **9(13)** DOI:  
886 10.1128/MRA.00202-20
- 887

- 888 **88.** Ward, L. M., Bertran, E., Johnston, D. T. (2020b) Genomic sequence analysis  
889 of *Dissulfurirhabdus thermomarina* SH388 and proposed reassignment to  
890 Dissulfurirhabdaceae fam. nov. *Microbial Genomics* **6(7)** DOI :10.1099/mgen.0.000390
- 891
- 892 **89.** Ward, L.M., Lingappa, U.F., Grotzinger, J.P. and Fischer, W.W., 2020. Microbial mats in  
893 the Turks and Caicos Islands reveal diversity and evolution of phototrophy in the  
894 Chloroflexota order Aggregatilineales. *Environmental Microbiome*, *15*, pp.1-9.
- 895
- 896 **90.** Ward, L.M. and Shih, P.M., 2021. Granick revisited: synthesizing evolutionary and  
897 ecological evidence for the late origin of bacteriochlorophyll via ghost lineages and horizontal  
898 gene transfer. *Plos one*, *16(1)*, p.e0239248.
- 899
- 900 **91.** Waterhouse, A. M., Procter, J. B., Martin, D. M. A., Clamp, M., and Barton, G. J. (2009)  
901 Jalview Version 2-a multiple sequence alignment editor and analysis workbench  
902 *Bioinformatics* **25(9): 1189-1191** DOI: 10.1093/bioinformatics/btp033
- 903
- 904 **92.** Widdel, F. (1980) Anaerober Abbau von Fettsauren und Benzoesaure durch neu isolierte  
905 Arten sulfat-reduzierender Bakterien. Dissertation. Georg-August-Universitat zu Gottingen.  
906 Lindhorst/Schaumburg-Lippe, Gottingen, **pp. 7–149**
- 907
- 908 **93.** Widdel, F., Pfennig, N. (1982) Studies on dissimilatory sulfate-reducing bacteria that  
909 decompose fatty acids. II. Incomplete oxidation of propionate by *Desulfobulbus propionicus*  
910 gen. nov. sp. Nov. *Arch Microbiol* **131:360–365** DOI: 10.1007/BF00411187
- 911
- 912 **94.** Wing, B. A., and Halevy, I. (2014) Intracellular metabolite levels shape sulfur isotope  
913 fractionation during microbial sulfate respiration. *Proceedings of the National Academy of*  
914 *Sciences* **111, 51, 18116–18125** DOI: 10.1073/pnas.1407502111
- 915
- 916 **95.** Zane, G. M., Yen, H.-c. B., and Wall, J. D. (2010) Effect of the deletion of qmoabc and  
917 the promoter-distal gene encoding a hypothetical protein on sulfate reduction in *Desulfovibrio*  
918 *vulgaris* Hildenborough. *Applied and Environmental Microbiology* **76, 16** DOI:  
919 10.1128/AEM.00691-10

920

## 921 **Supplementary Material**

922

### 923 **Tables**

924

925 **Table S.1:** Summary of capacity to perform microbial sulfate reduction (type of electron  
926 acceptor used indicated) and/or microbial sulfur disproportionation (type of disproportionation



927 performed indicated) as described in peer-reviewed reports. NR: Not Reported; NA: Not  
 928 Applicable; (1) Only “personal communication” found then, by default, indicated as Not  
 929 Reported; (2) Reported in the reference given but no supporting study found.  
 930

| Metabolism                                                                                                            | Ref.         | MSD                        | Ref.     | SO <sub>3</sub> <sup>2-</sup> | Ref.     | SO <sub>3</sub> <sup>2-</sup> | Ref.             | S <sub>2</sub> O <sub>3</sub> <sup>2-</sup> | Ref.     |
|-----------------------------------------------------------------------------------------------------------------------|--------------|----------------------------|----------|-------------------------------|----------|-------------------------------|------------------|---------------------------------------------|----------|
| <b>SRM</b>                                                                                                            |              | <b>S<sup>0</sup> disp.</b> |          |                               |          |                               |                  |                                             |          |
| SO <sub>4</sub> <sup>2-</sup> and SO <sub>3</sub> <sup>2-</sup>                                                       | [333]        | NR                         | NA       | NR                            | NA       | NR                            | NA               | NR                                          | NA       |
| SO <sub>4</sub> <sup>2-</sup> , SO <sub>3</sub> <sup>2-</sup> , S <sub>2</sub> O <sub>3</sub> <sup>2-</sup>           | [48, 49]     | NR                         | NA       | NR                            | NA       | NR                            | NA               | NR                                          | NA       |
| SO <sub>4</sub> <sup>2-</sup> and SO <sub>3</sub> <sup>2-</sup>                                                       | [76]         | NR (1)                     | NA       | NR                            | NA       | NR                            | NA               | NR                                          | NA       |
| SO <sub>4</sub> <sup>2-</sup> and SO <sub>3</sub> <sup>2-</sup>                                                       | [42]         | NR                         | NA       | NR                            | NA       | NR                            | NA               | NR                                          | NA       |
| SO <sub>4</sub> <sup>2-</sup> , SO <sub>3</sub> <sup>2-</sup> , S <sub>2</sub> O <sub>3</sub> <sup>2-</sup>           | [55]         | NR                         | NA       | NR                            | NA       | NR                            | NA               | NR                                          | NA       |
| SO <sub>4</sub> <sup>2-</sup> , SO <sub>3</sub> <sup>2-</sup> , S <sub>2</sub> O <sub>3</sub> <sup>2-</sup>           | [39]         | N                          | [39]     | NR                            | NA       | NR                            | NA               | N                                           | [39]     |
| SO <sub>4</sub> <sup>2-</sup> , SO <sub>3</sub> <sup>2-</sup> , S <sub>2</sub> O <sub>3</sub> <sup>2-</sup>           | [70]         | N                          | [40]     | NR                            | NA       | NR                            | NA               | NR                                          | NA       |
| SO <sub>4</sub> <sup>2-</sup> and S <sub>2</sub> O <sub>3</sub> <sup>2-</sup>                                         | [78, 79]     | NR                         | NA       | NR                            | NA       | NR                            | NA               | NR                                          | NA       |
| SO <sub>4</sub> <sup>2-</sup> , SO <sub>3</sub> <sup>2-</sup> , S <sub>2</sub> O <sub>3</sub> <sup>2-</sup>           | [71]         | NR                         | NA       | N                             | [71]     | N                             | [71]             | N                                           | [71]     |
| SO <sub>4</sub> <sup>2-</sup> , SO <sub>3</sub> <sup>2-</sup> , S <sub>2</sub> O <sub>3</sub> <sup>2-</sup> reduction | [76, 92, 93] | Y                          | [13, 40] | N                             | [25]     | Y                             | [13, 32, 47, 56, | Y                                           | [27]     |
| N                                                                                                                     | [27]         | Y                          | [27]     | Y                             | [27]     | Y                             | [27]             | Y                                           | [27]     |
| SO <sub>4</sub> <sup>2-</sup> , SO <sub>3</sub> <sup>2-</sup> , S <sub>2</sub> O <sub>3</sub> <sup>2-</sup>           | [42, 69]     | Y                          | [19, 40] | Y                             | [19, 40] | Y                             | [19, 40]         | Y                                           | [19, 40] |
| SO <sub>4</sub> <sup>2-</sup> , SO <sub>3</sub> <sup>2-</sup> , S <sub>2</sub> O <sub>3</sub> <sup>2-</sup>           | [42]         | Y                          | [28]     | N                             | [28]     | N                             | [28]             | N                                           | [28]     |
| SO <sub>4</sub> <sup>2-</sup> , SO <sub>3</sub> <sup>2-</sup> , S <sub>2</sub> O <sub>3</sub> <sup>2-</sup>           | [42, 69]     | NR                         | NA       | NR                            | NA       | NR                            | NA               | NR                                          | NA       |
| SO <sub>4</sub> <sup>2-</sup> , SO <sub>3</sub> <sup>2-</sup> , S <sub>2</sub> O <sub>3</sub> <sup>2-</sup>           | [42, 54]     | Y (2)                      | [69]     | NR                            | NA       | NR                            | NA               | NR                                          | NA       |
| SO <sub>4</sub> <sup>2-</sup> , SO <sub>3</sub> <sup>2-</sup> , S <sub>2</sub> O <sub>3</sub> <sup>2-</sup>           | [69]         | N                          | [46, 69] | NR                            | NA       | N                             | [46, 69]         | N                                           | [46, 69] |
| SO <sub>4</sub> <sup>2-</sup> and S <sub>2</sub> O <sub>3</sub> <sup>2-</sup>                                         | [24]         | NR                         | NA       | NR                            | NA       | NR                            | NA               | NR                                          | NA       |

931

| Species                          |
|----------------------------------|
| <i>Desulfopila inferna</i>       |
| <i>Desulfobulbus marinus</i>     |
| <i>Desulfobulbus</i>             |
| <i>Desulfoprimum</i>             |
| <i>Desulfobulbus</i>             |
| <i>Desulforhopalus</i>           |
| <i>Desulfobulbus elongatus</i>   |
| <i>Desulfobulbus japonicus</i>   |
| <i>Desulfobulbus</i>             |
| <i>Desulfobulbus propionicus</i> |
| <i>Desulfocapsa sulfexigens</i>  |
| <i>Desulfocapsa</i>              |
| <i>Desulfofustis glycolicus</i>  |
| <i>Desulfopila aestuarii</i>     |
| <i>Desulforhopalus</i>           |
| <i>Desulfotalea psychrophila</i> |
| <i>Desulfobulbus oralis/1-</i>   |

932

933

934 **Supplemental Table 2:** AAI matrix of Desulfobulbales

935

### 936 **Figures**

937 **Figure S1:** Phylogeny of Heme-Copper Oxidoreductase (HCO) proteins from members of the  
938 Desulfobacterota. Leaves are labeled with the family of HCO (A-, B-, or C-family) GTDB  
939 taxonomic assignments and WGS or Genbank IDs, nodes are labeled with TBE support value.

940

941 **Figure S2:** Phylogeny of concatenated DsrA, DsrB, DsrC, AprA, and AprB proteins from  
942 members of the Desulfobacterota. Leaves are labeled with GTDB taxonomic assignments and  
943 WGS or Genbank IDs, nodes are labeled with TBE support value.

944

945 **Figure S3:** Phylogeny of *bd* oxidase proteins from members of the Desulfobacterota. Leaves are  
946 labeled with GTDB taxonomic assignments and WGS or Genbank IDs, nodes are labeled with  
947 TBE support value.

bioRxiv preprint doi: <https://doi.org/10.1101/2021.02.08.430318>; this version posted February 8, 2021. The copyright holder for this preprint (which was not certified by peer review) is the author/funder, who has granted bioRxiv a license to display the preprint in perpetuity. It is made available under aCC-BY-NC-ND 4.0 International license.

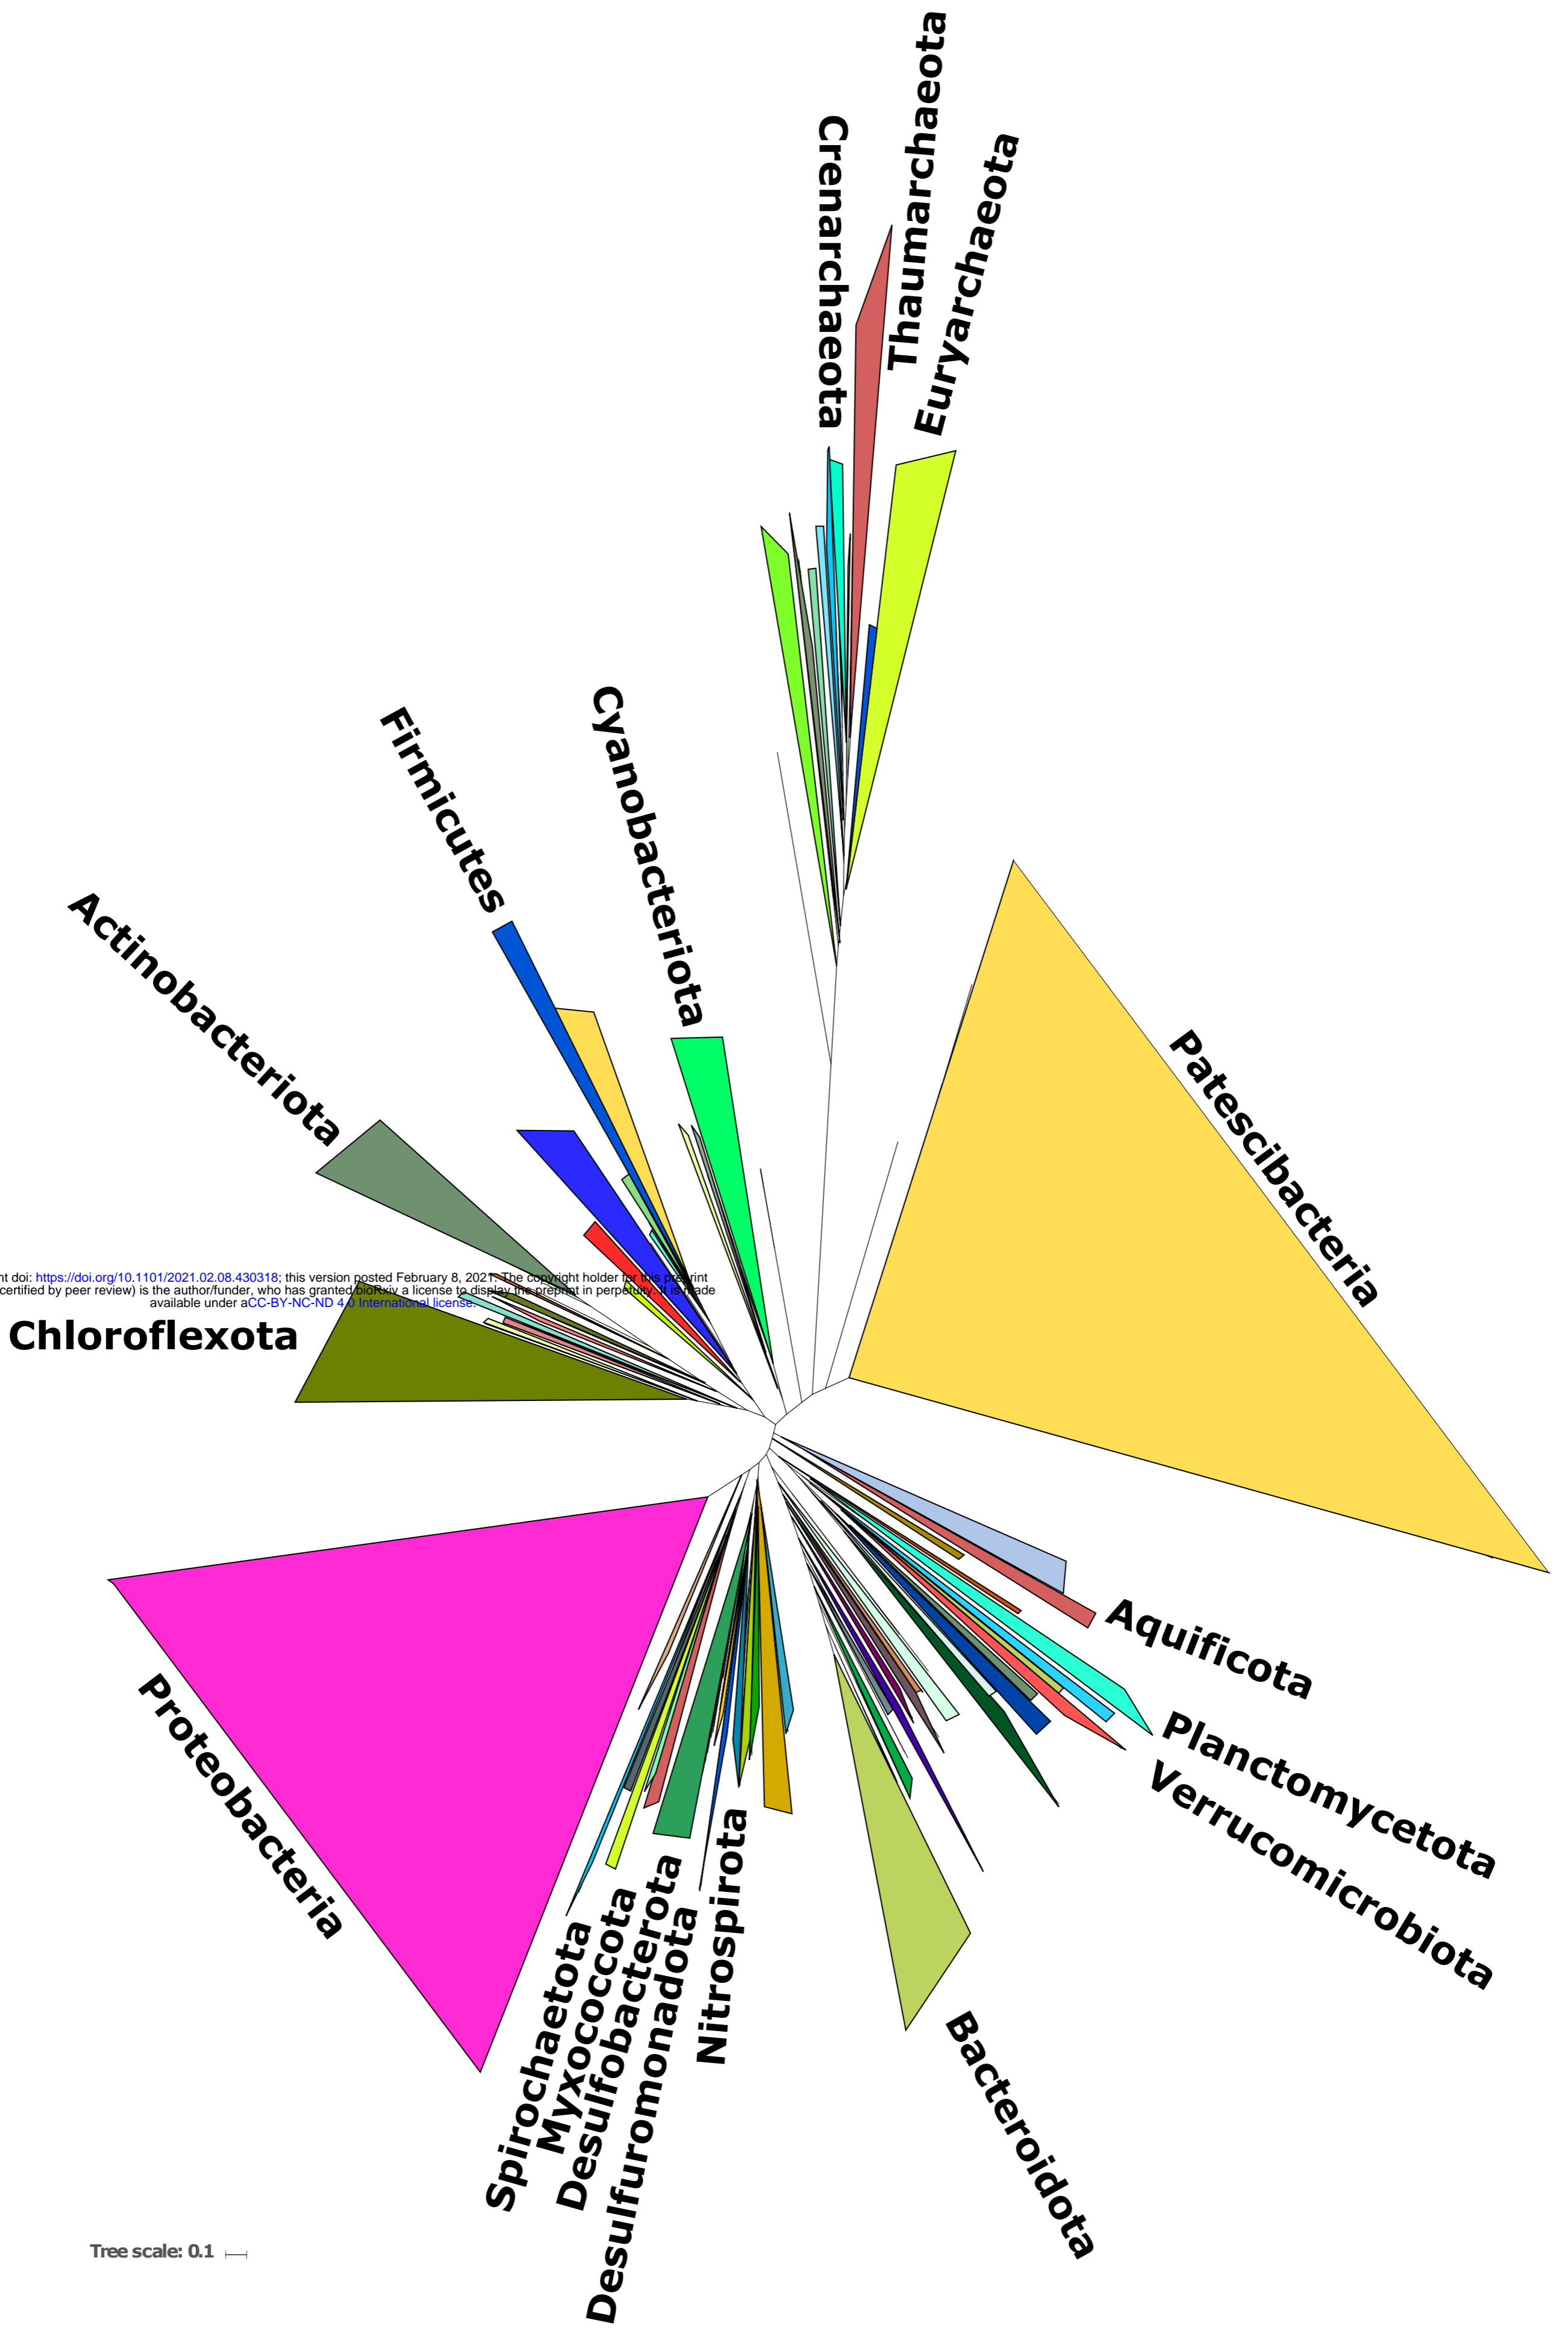

Tree scale: 0.1

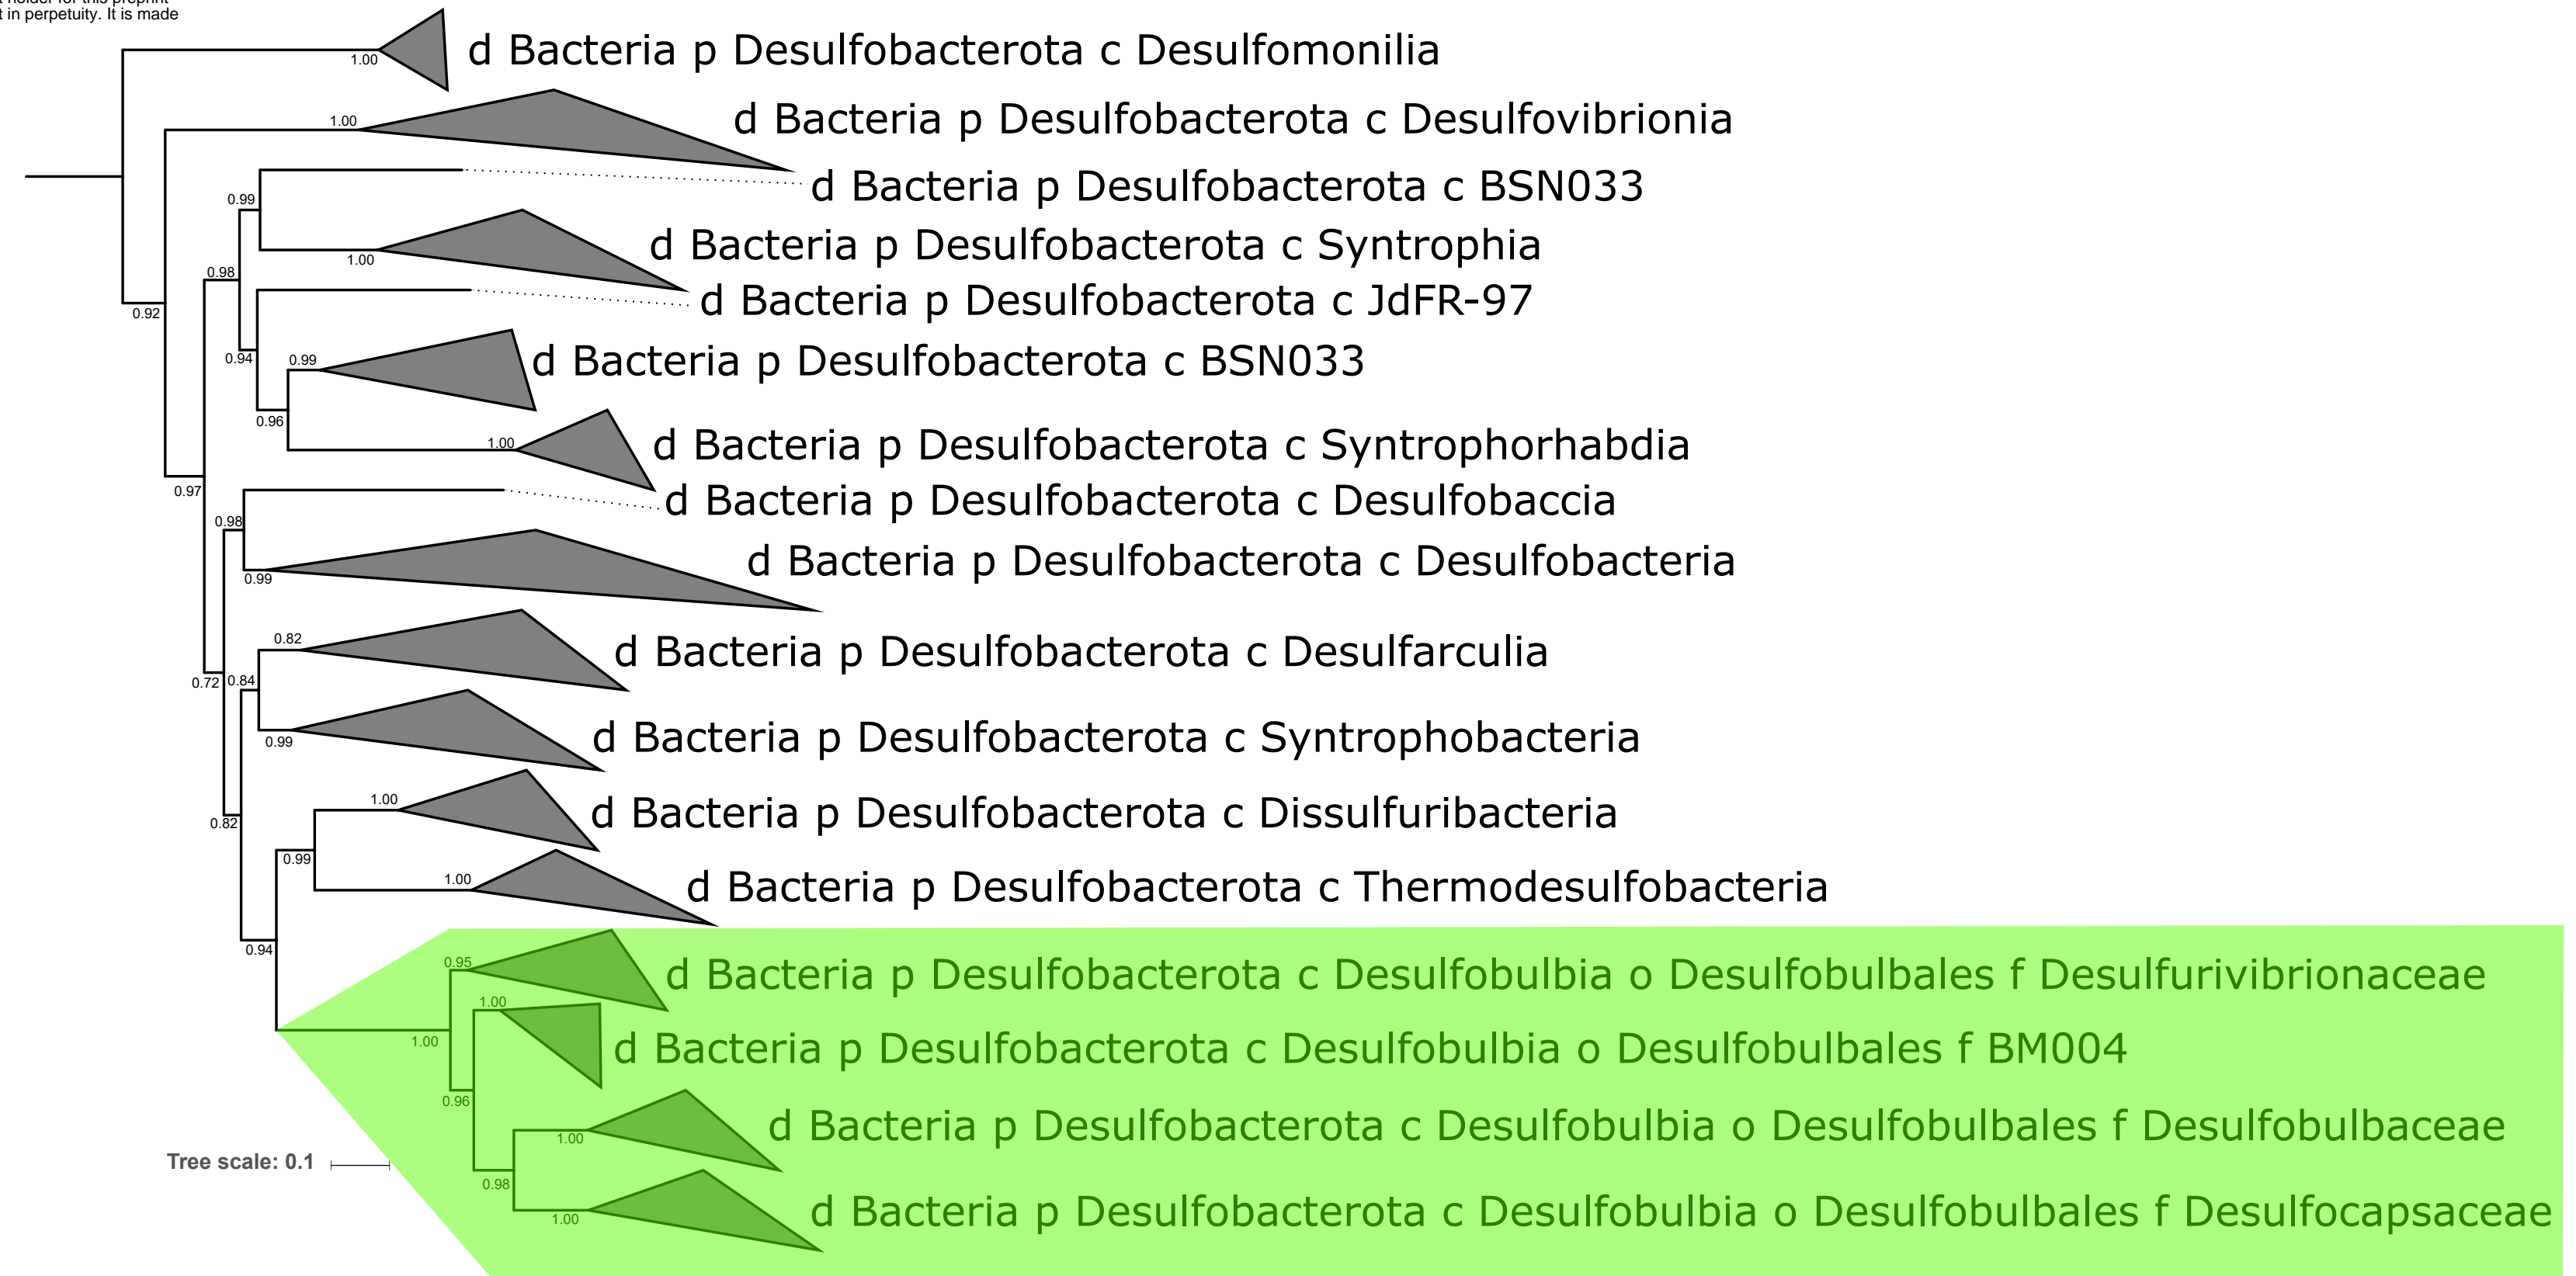

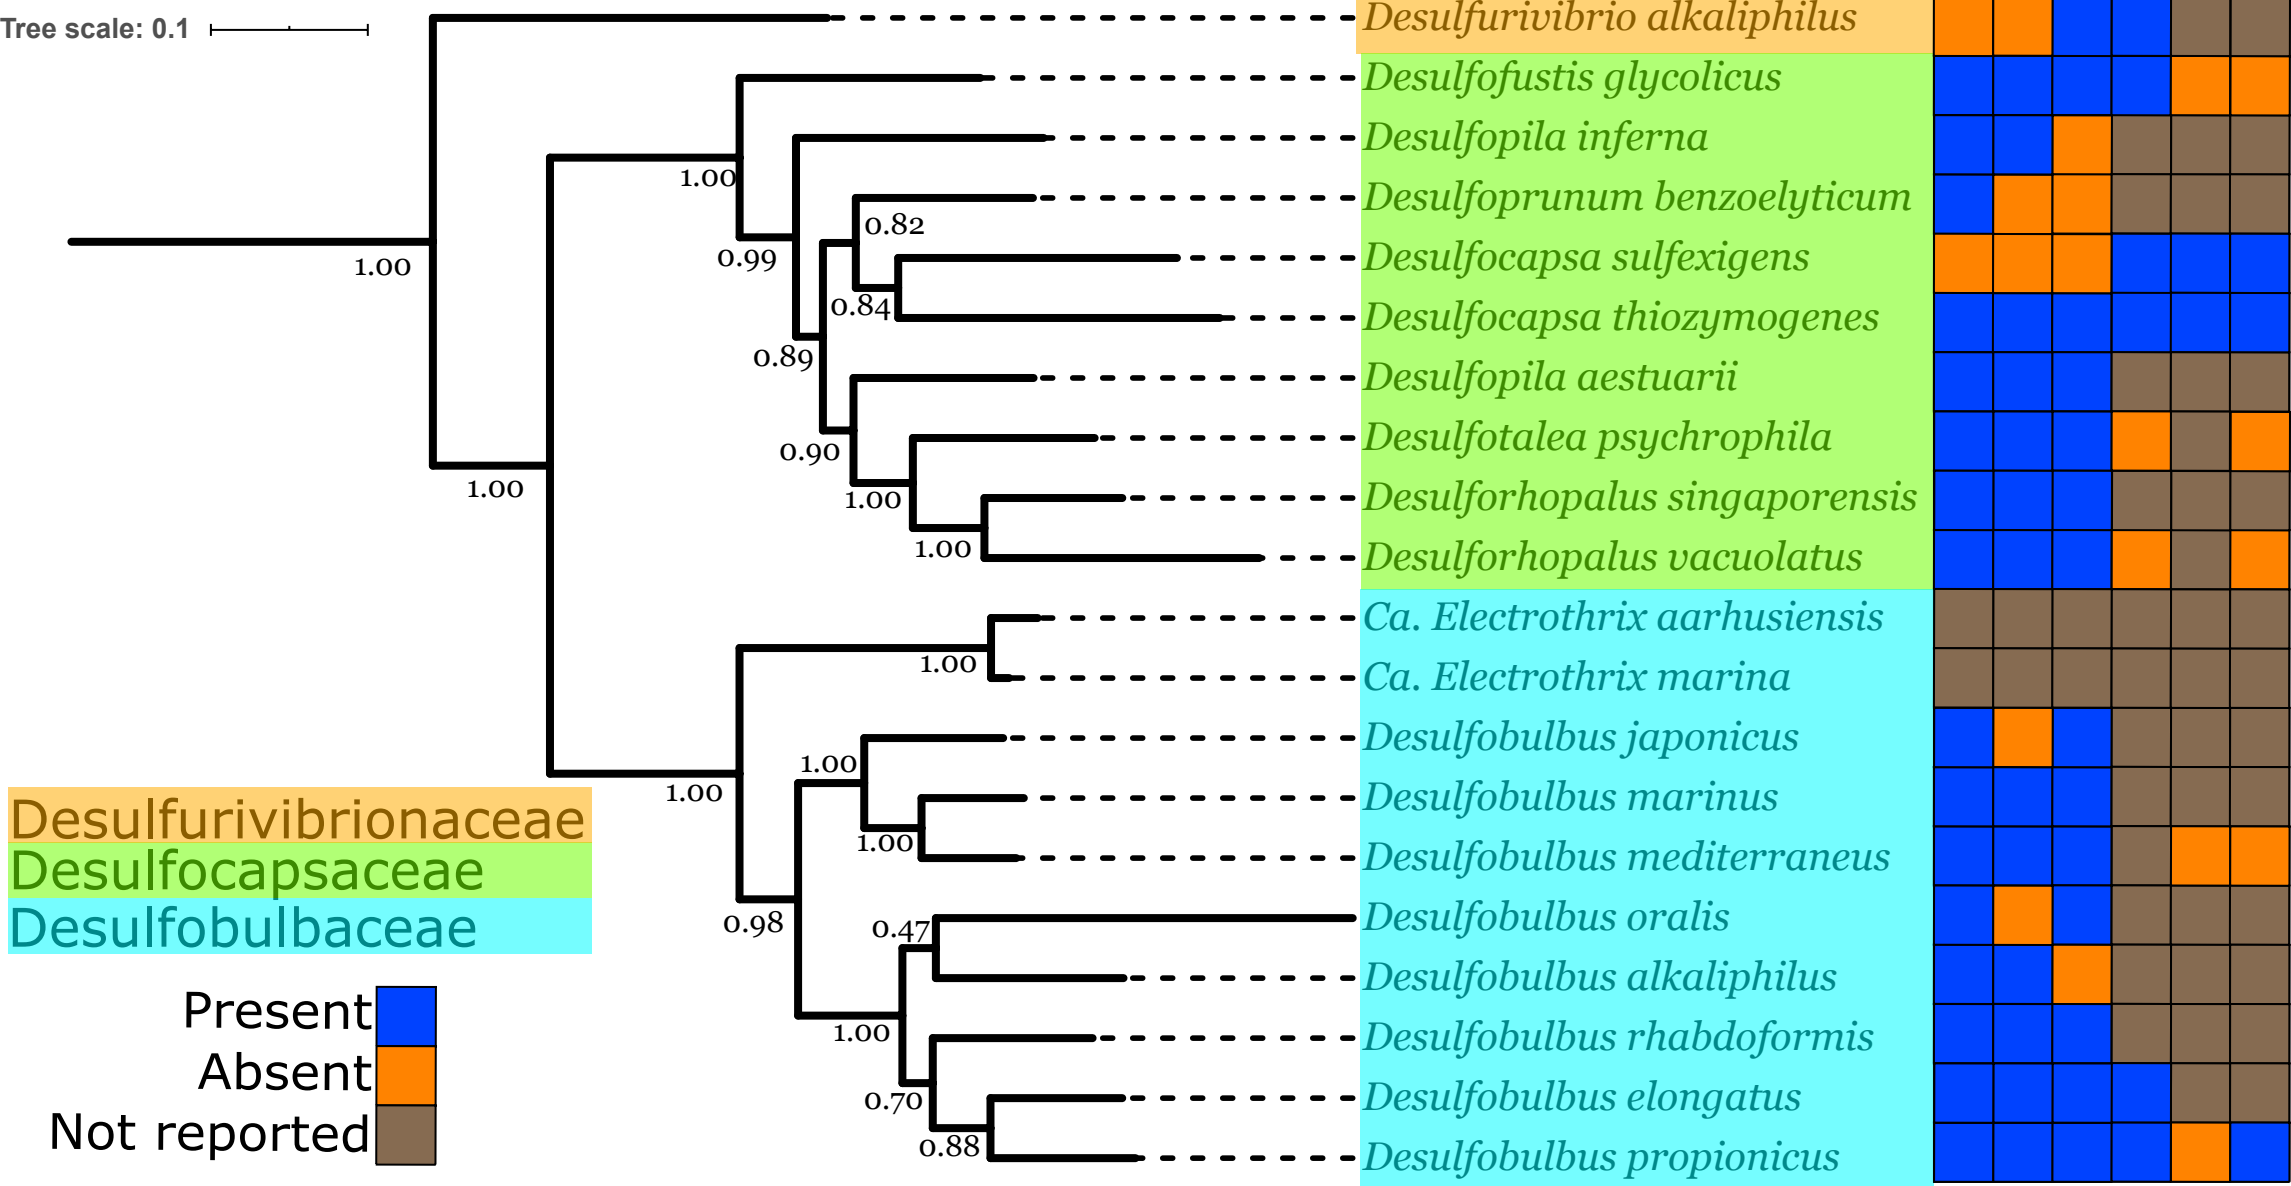

Source: https://www.biorxiv.org/content/biorxiv/early/2021/02/08/2021.02.08.430318.full.pdf
